# Supplementary material
Source: PubMed Central journal article supplement (PMC2835315)

**Electronic Supporting Information**

**Chemical synthesis and proinflammatory responses of  
monophosphoryl lipid A adjuvant candidates**

**Kaustabh K. Maiti, Michael DeCastro, Abu-Baker M. Abdel-Aal El-Sayed,  
Matthew I. Foote, Margreet A. Wolfert, and Geert-Jan Boons\***

*Eur. J. Org. Chem.*

**This PDF file includes:**

NMR spectra synthetic compounds

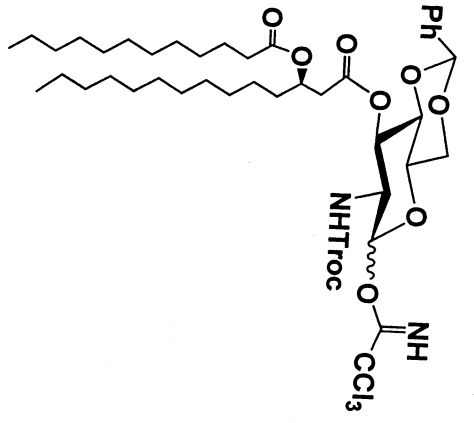

3

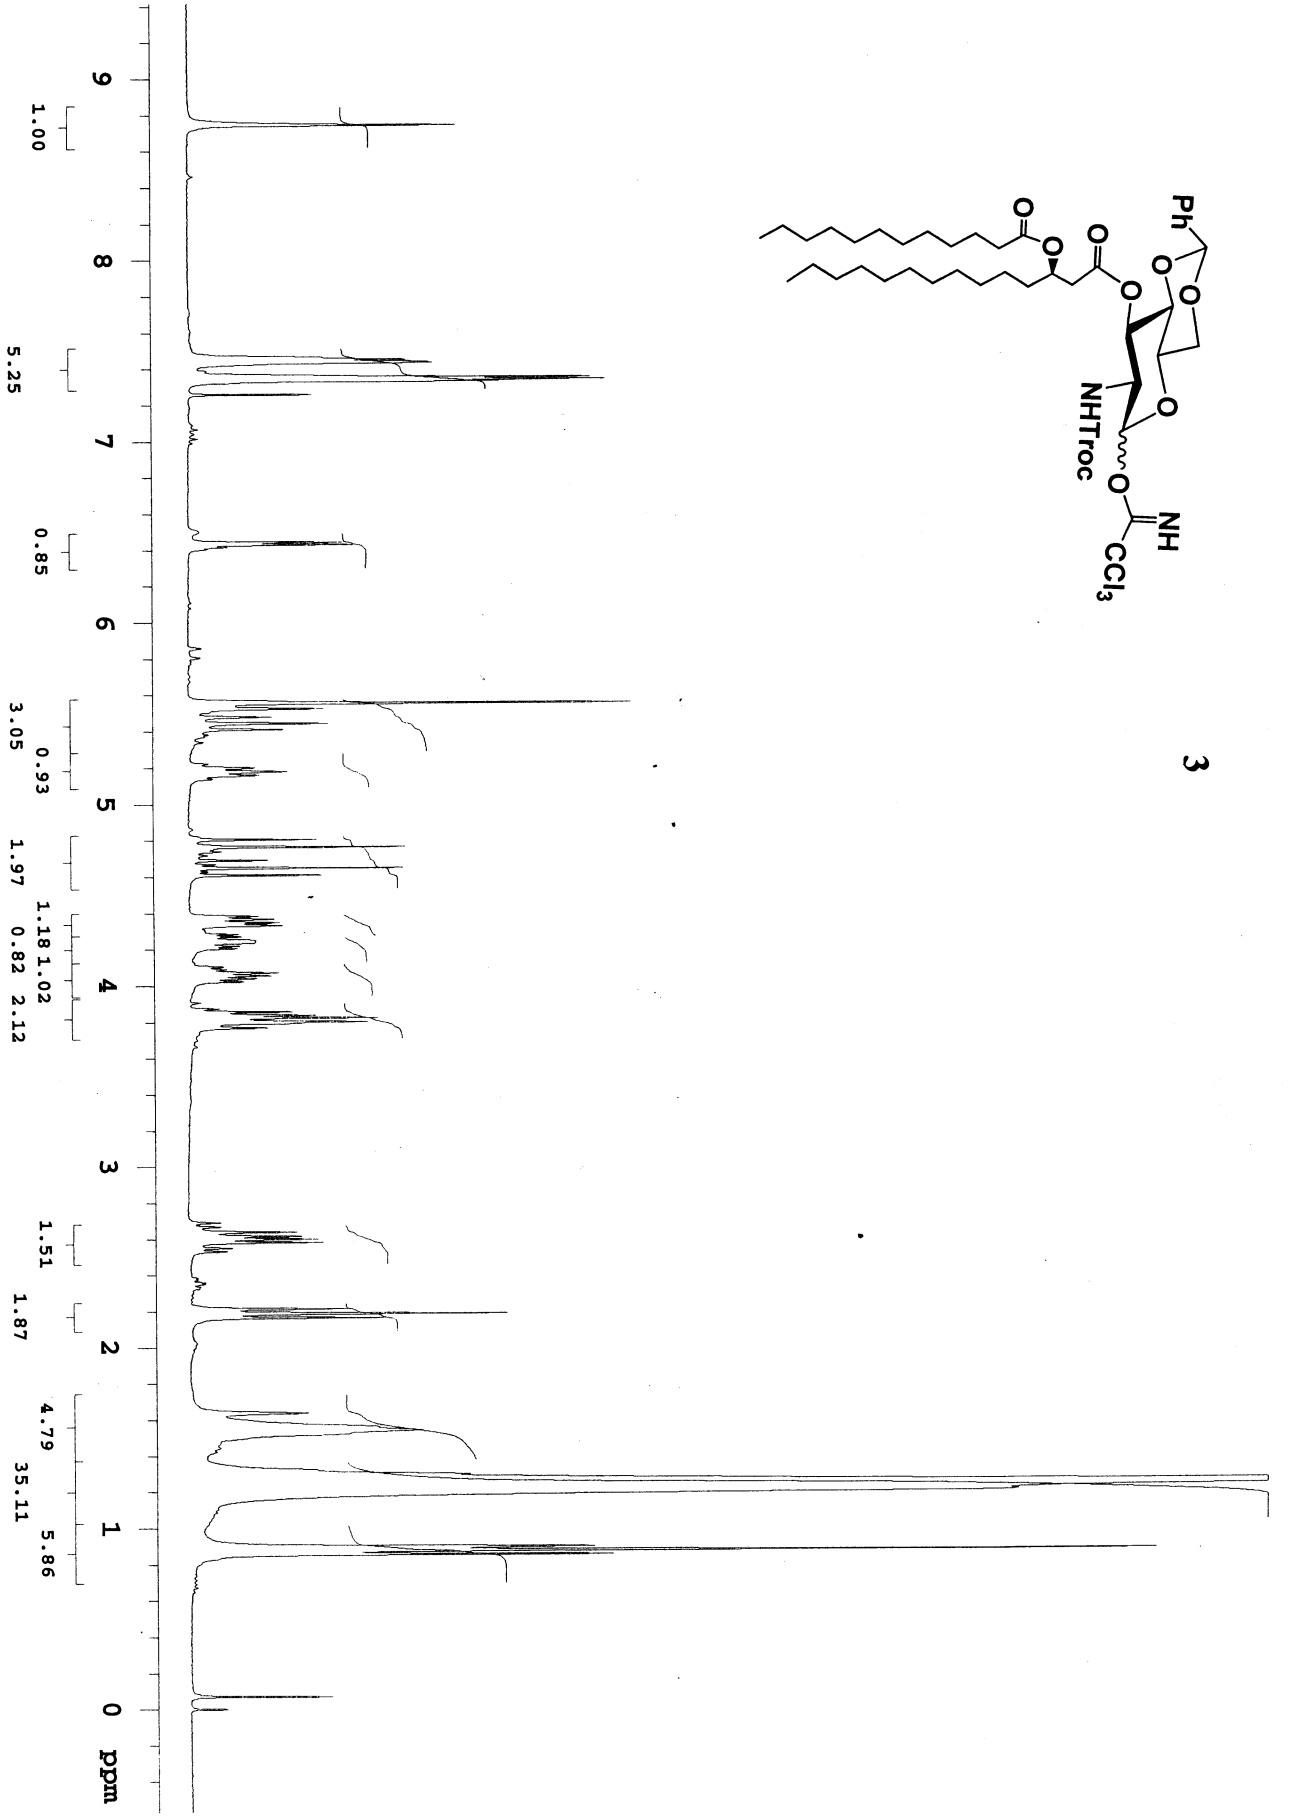

3

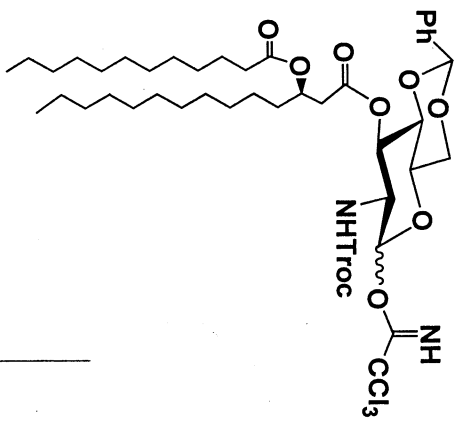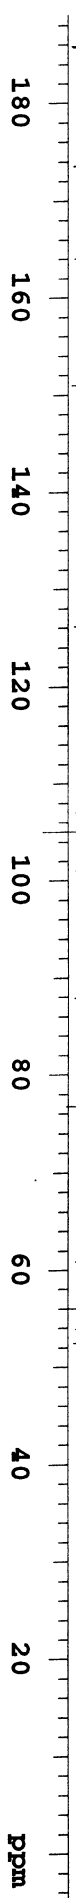

4

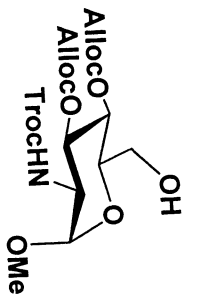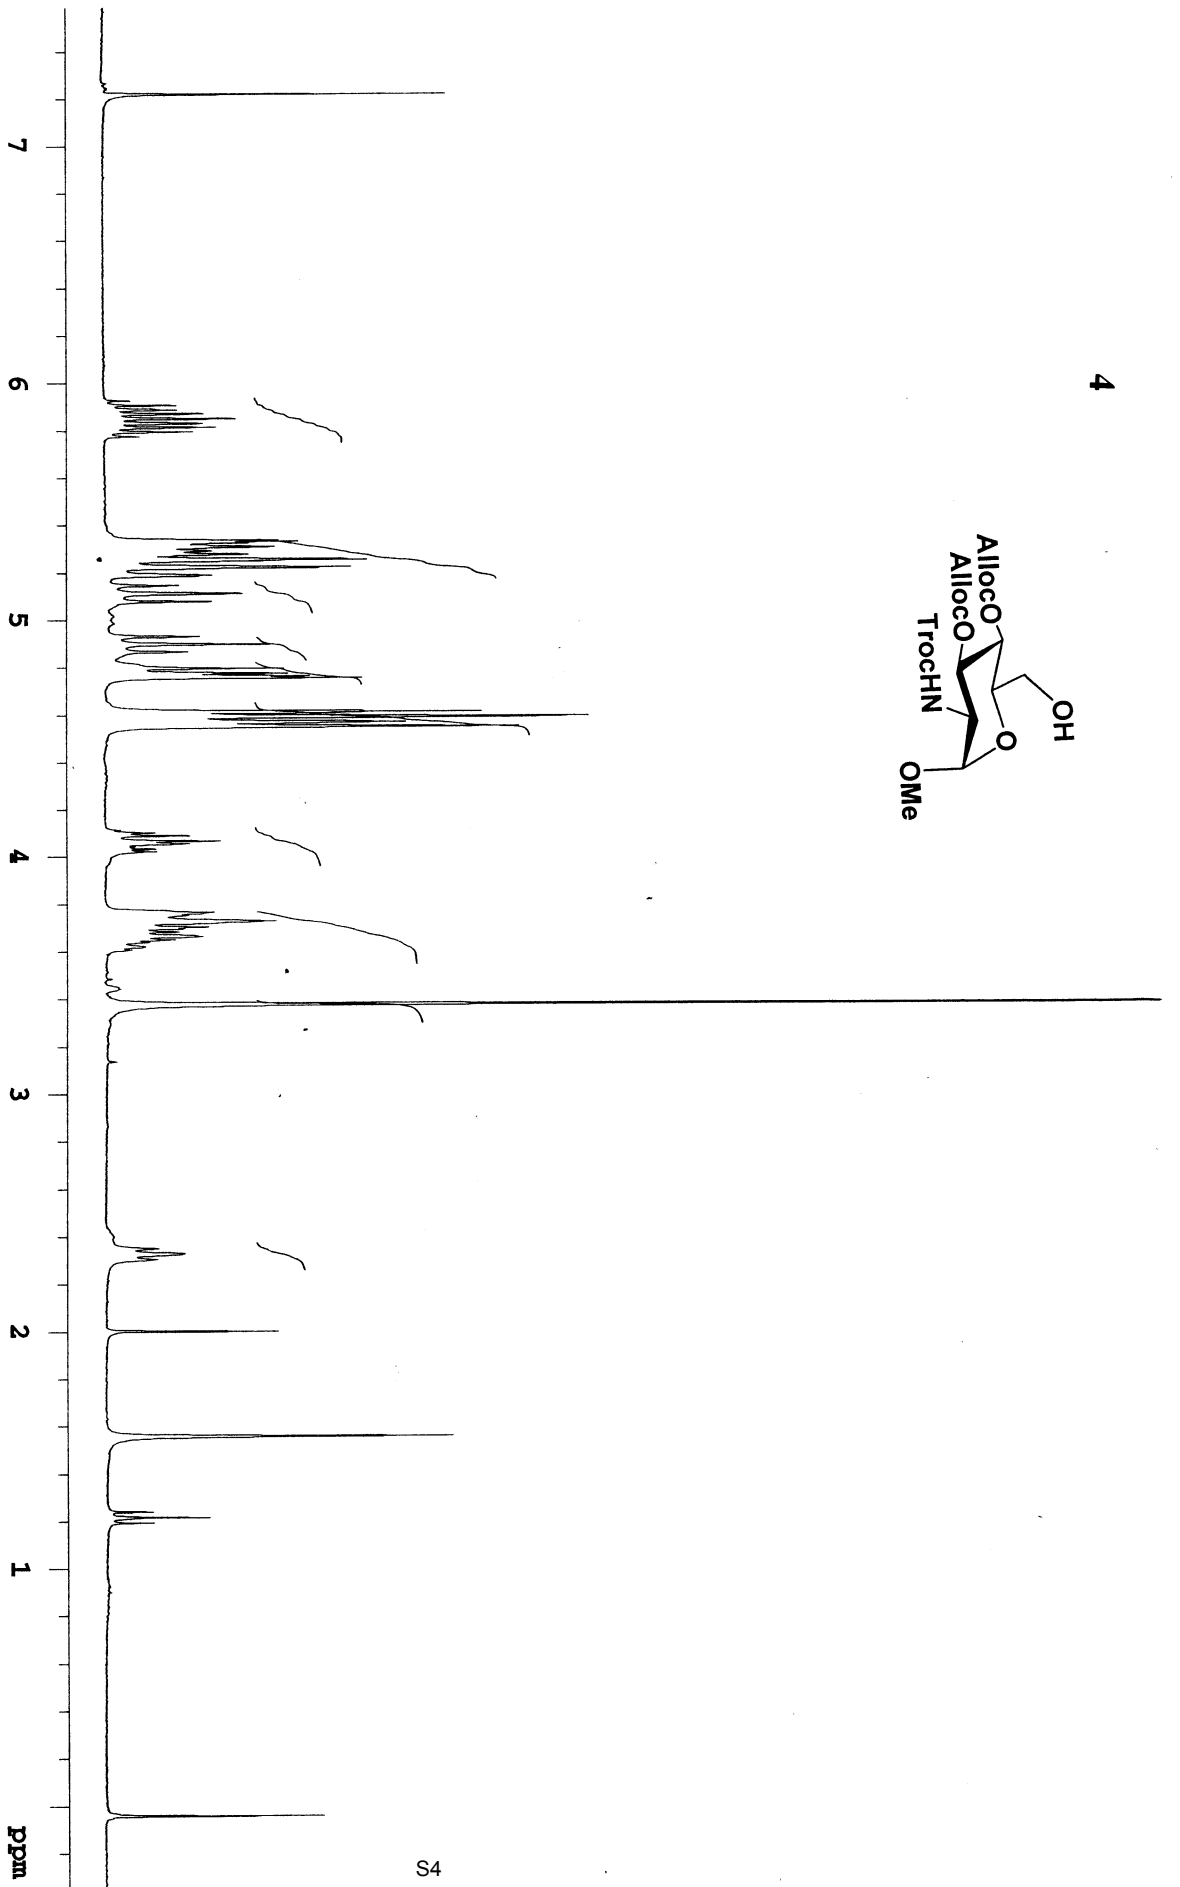

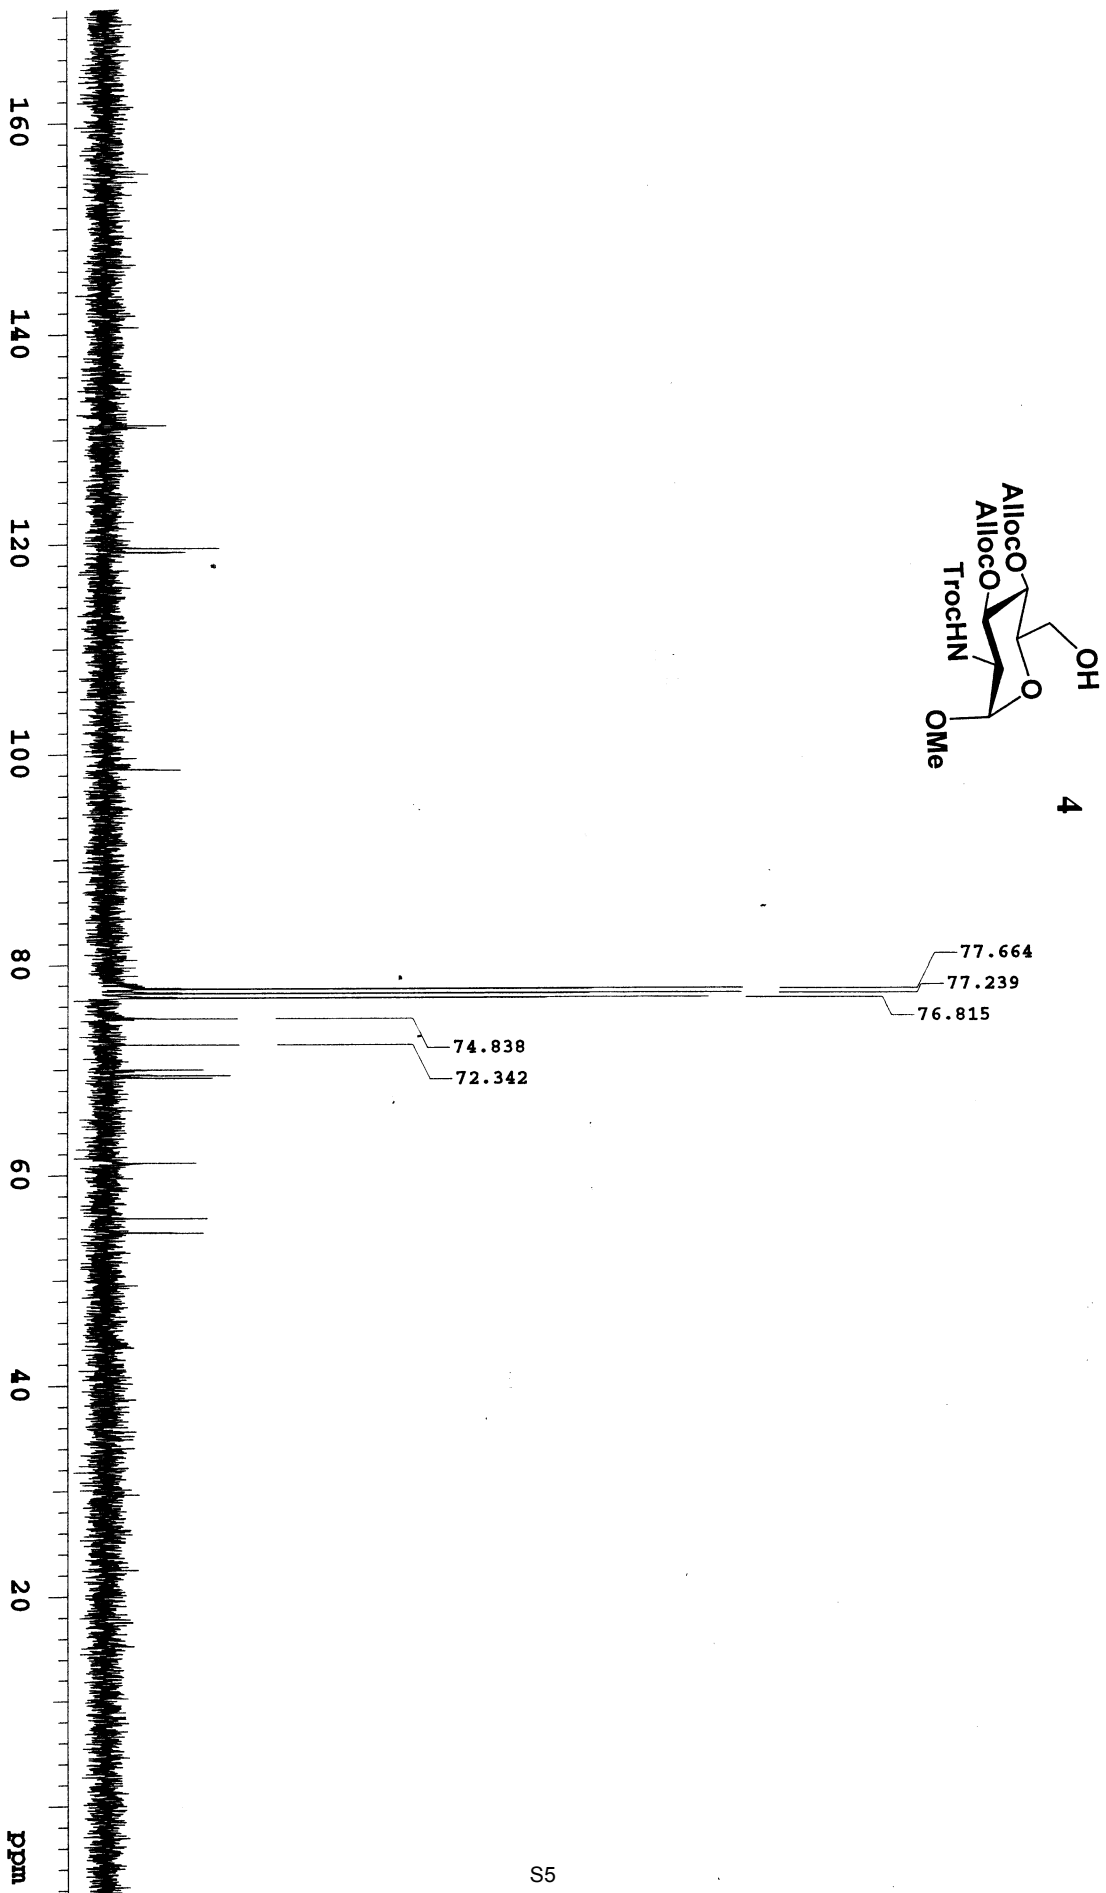

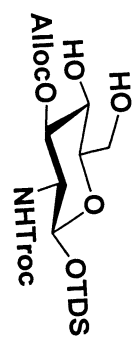

5

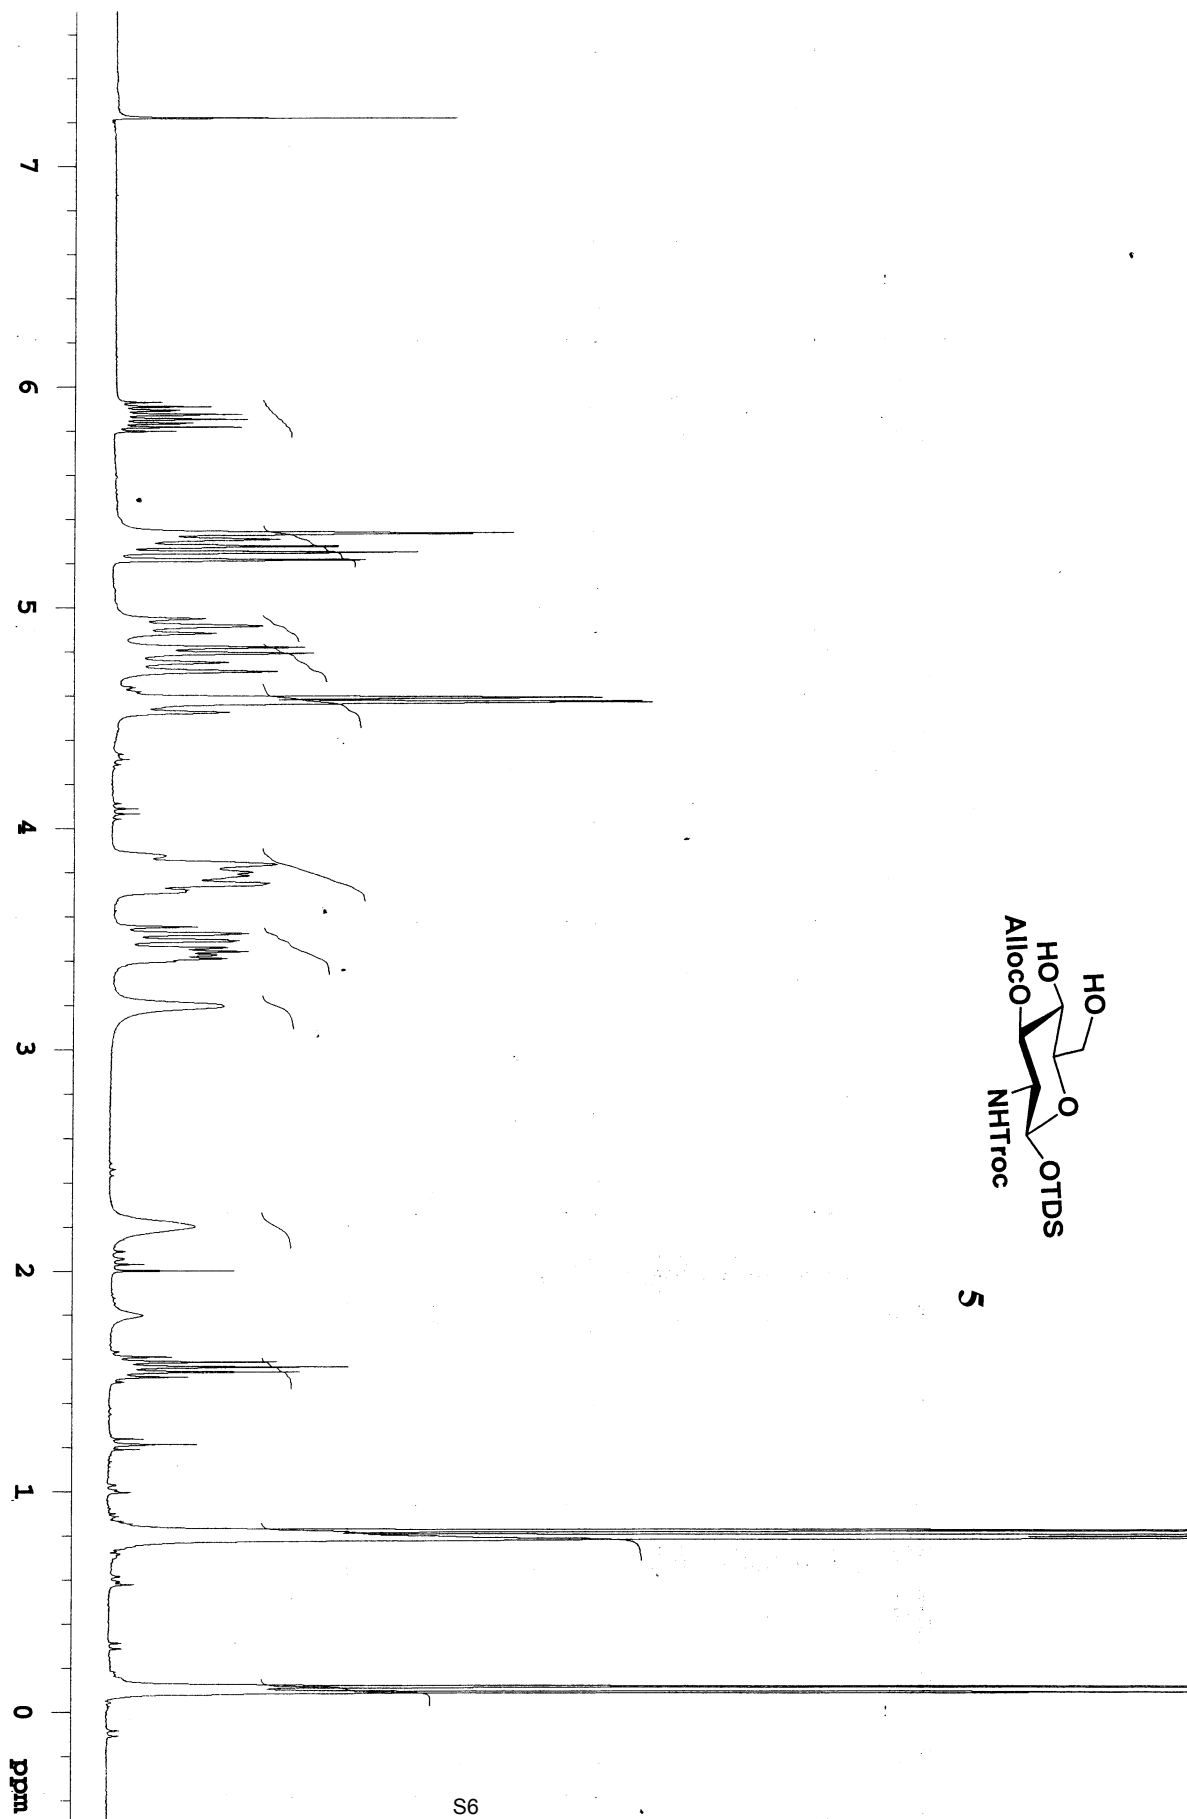

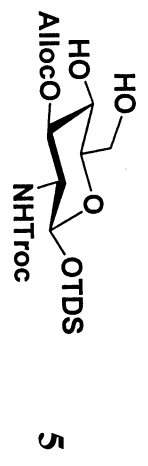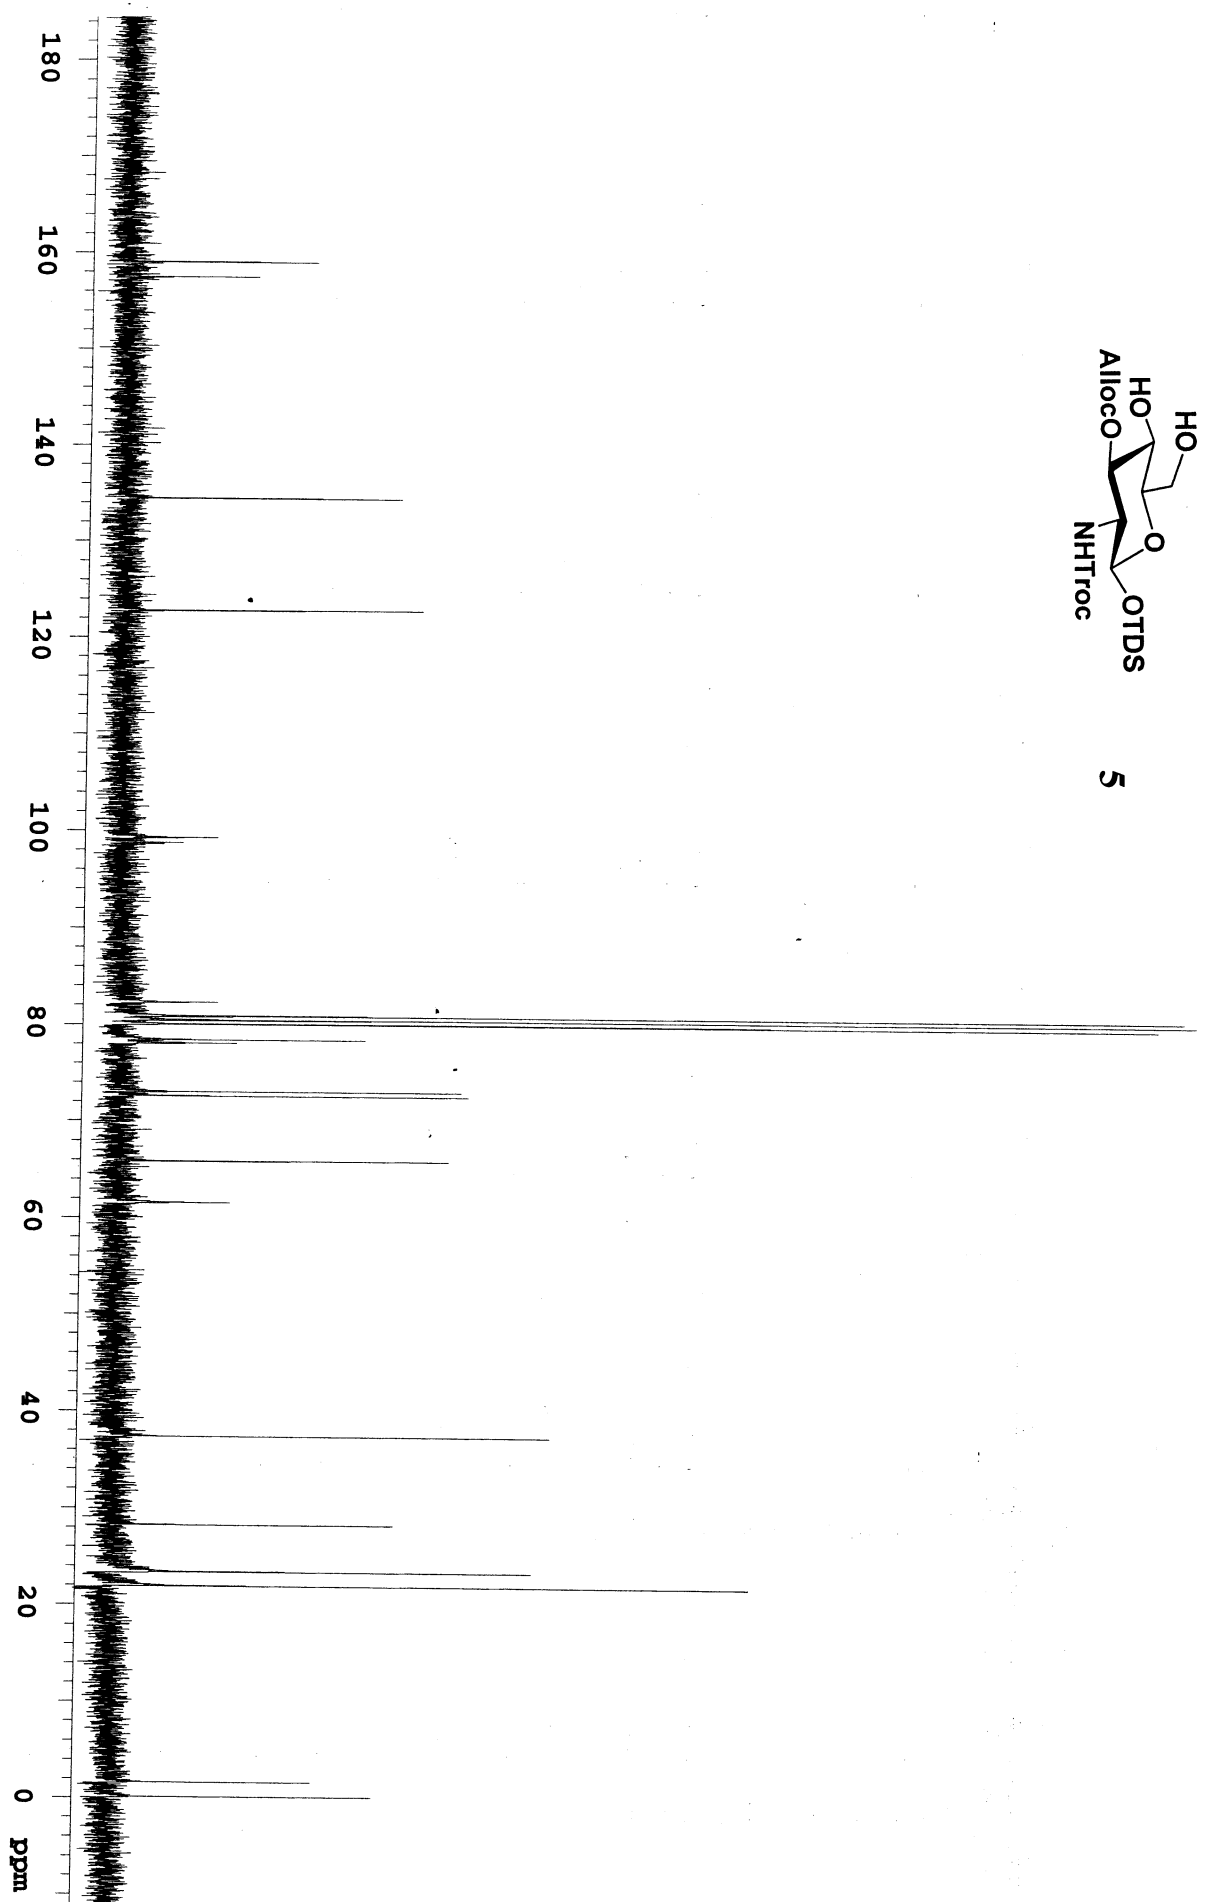

8

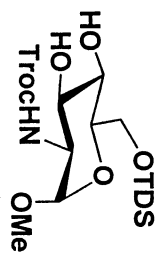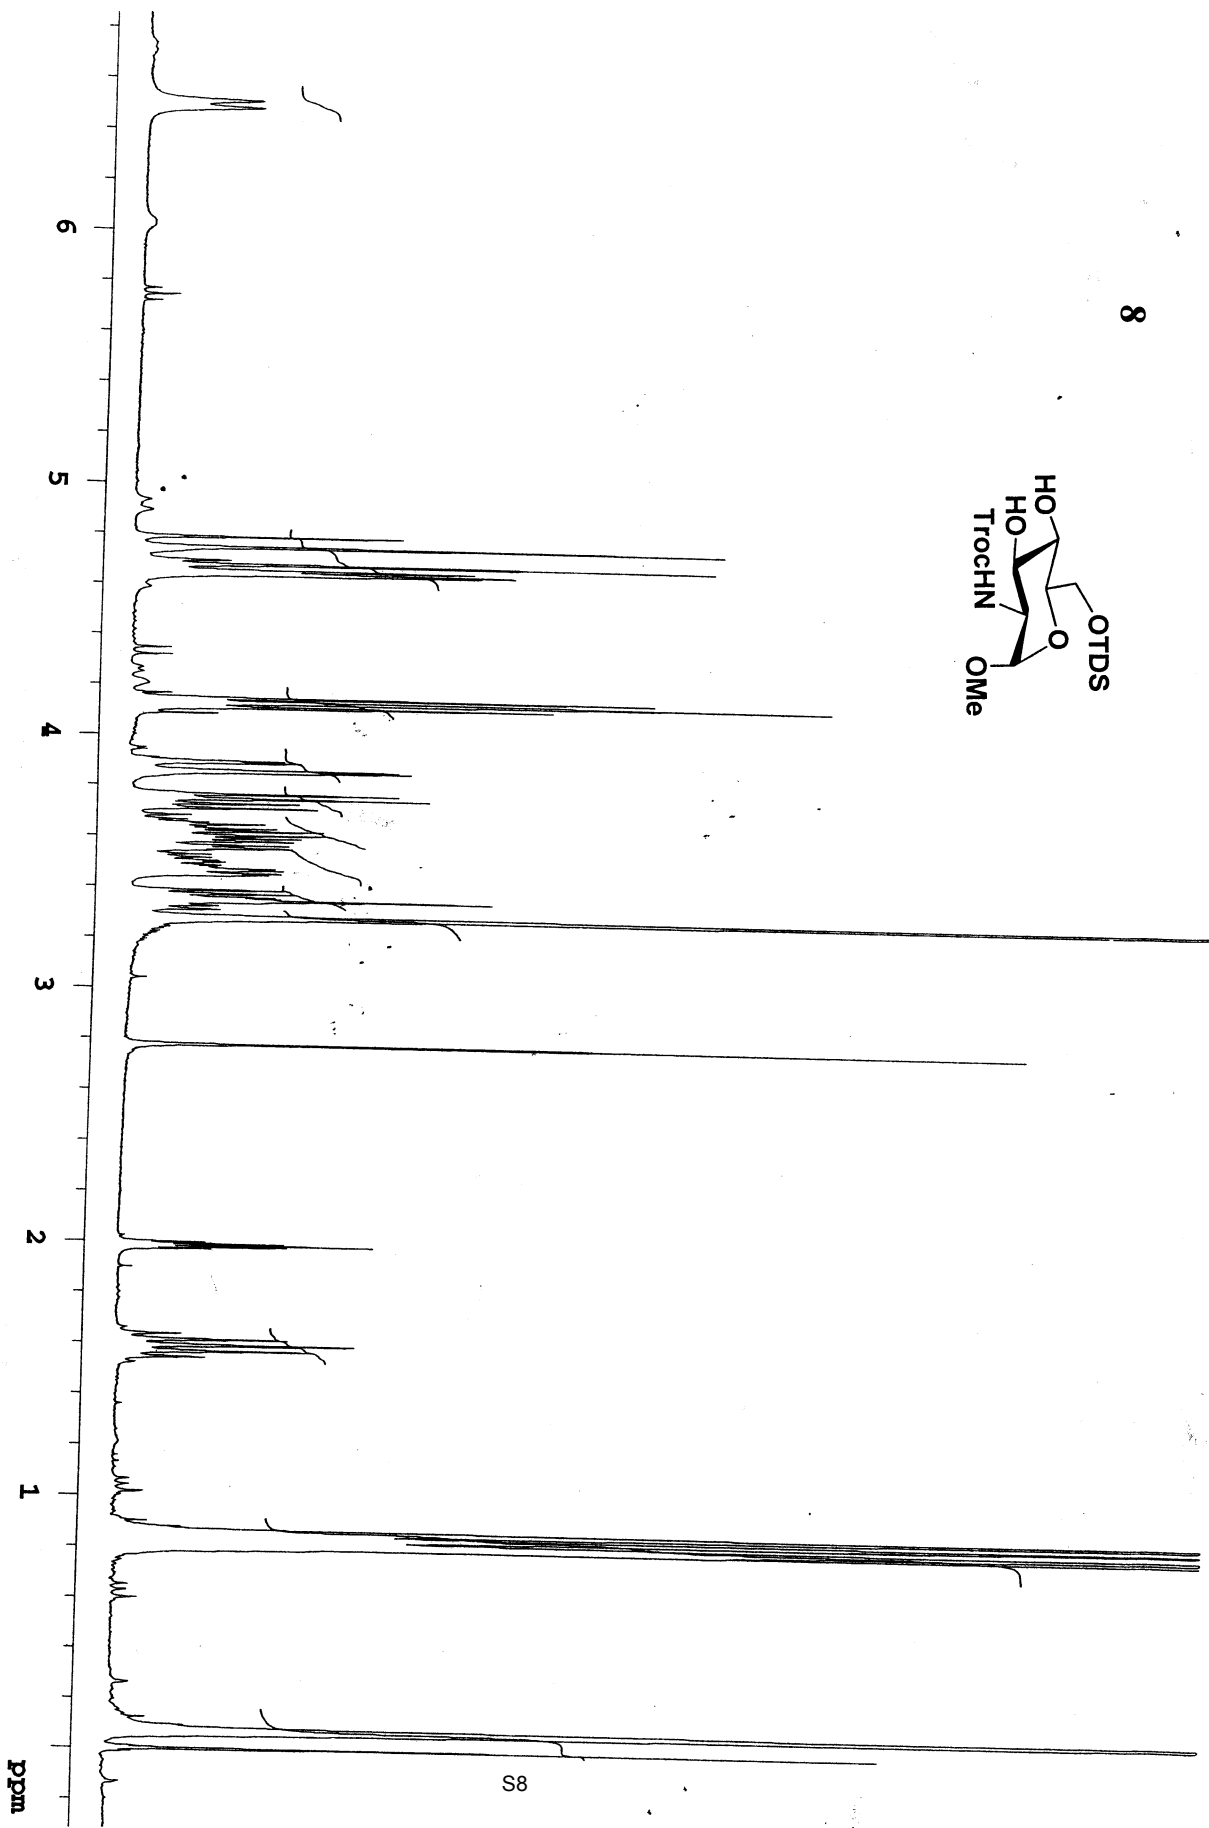



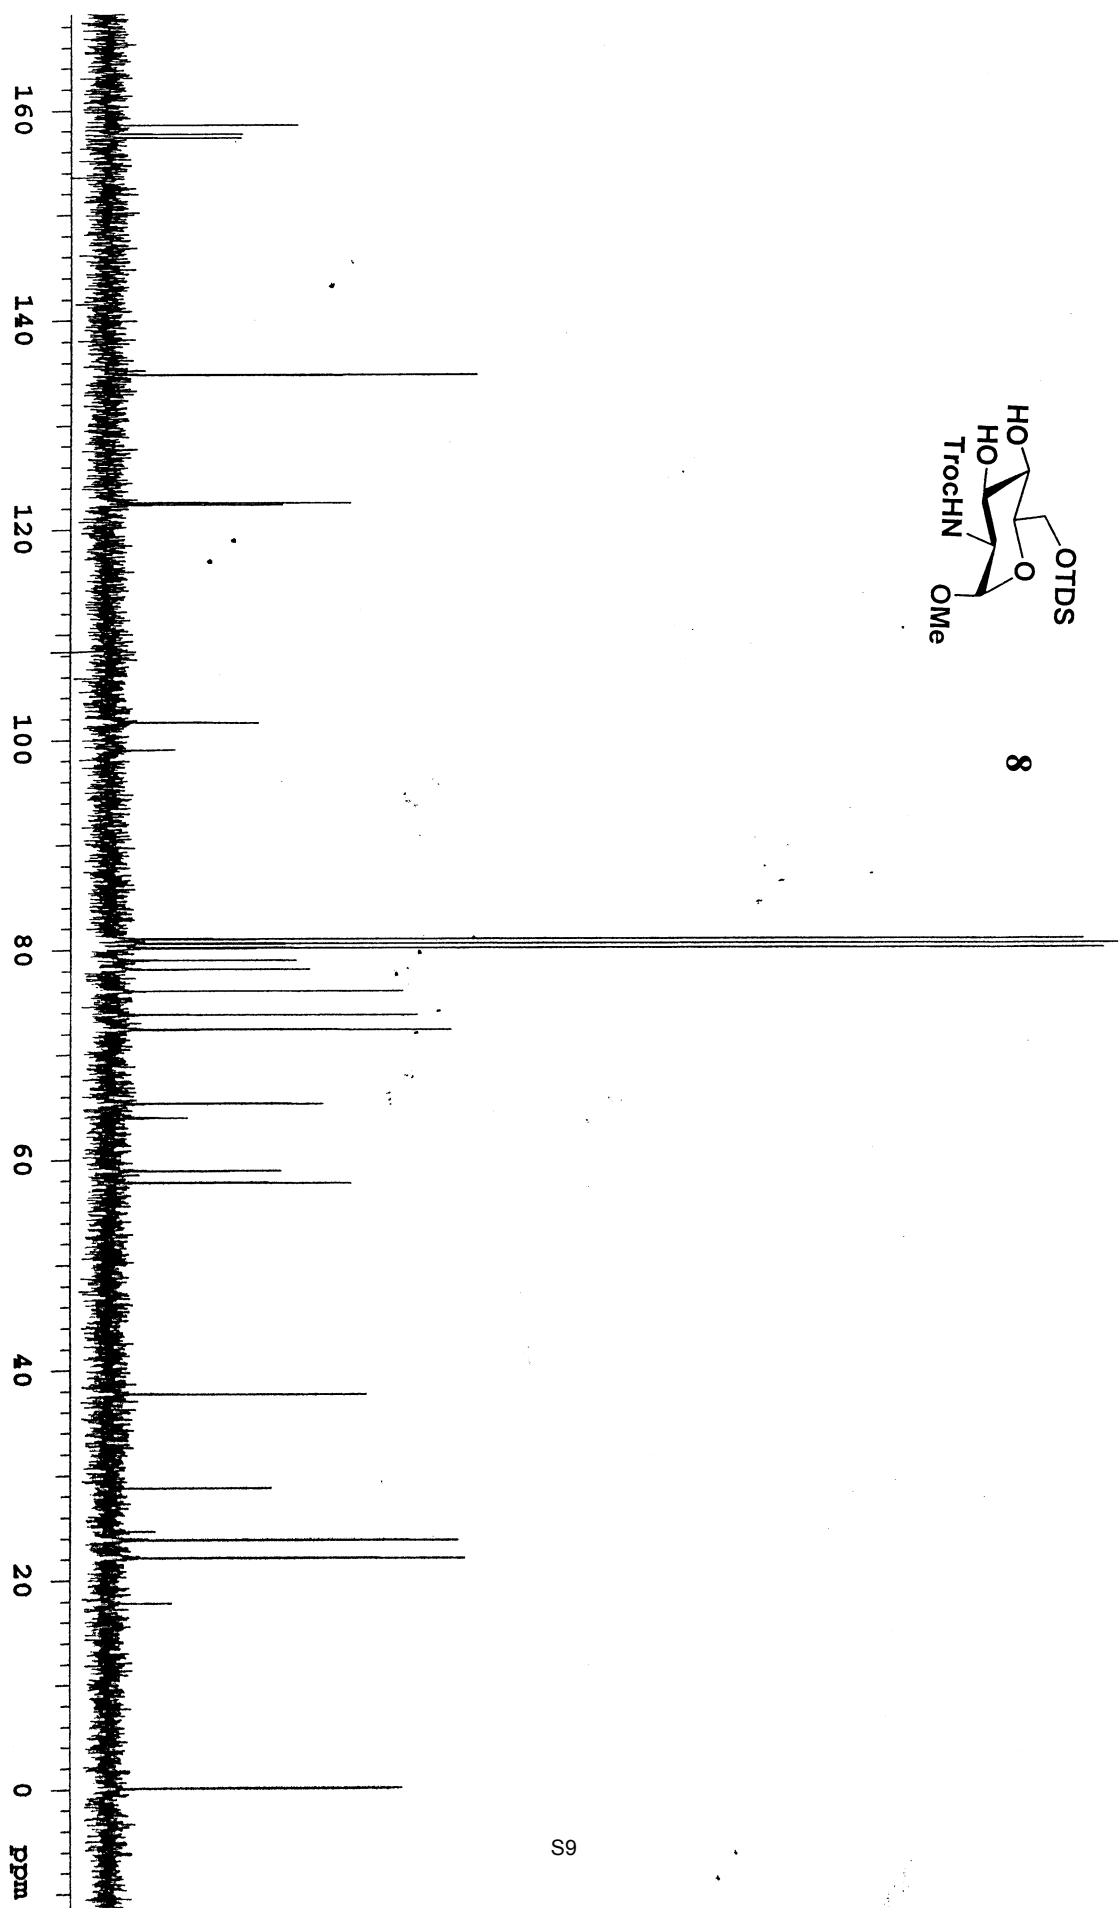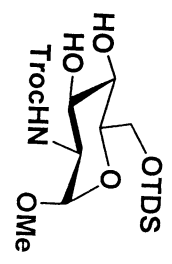

8

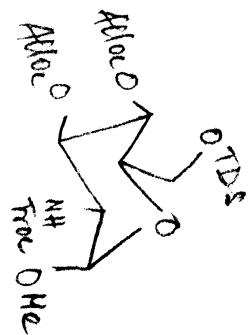

9

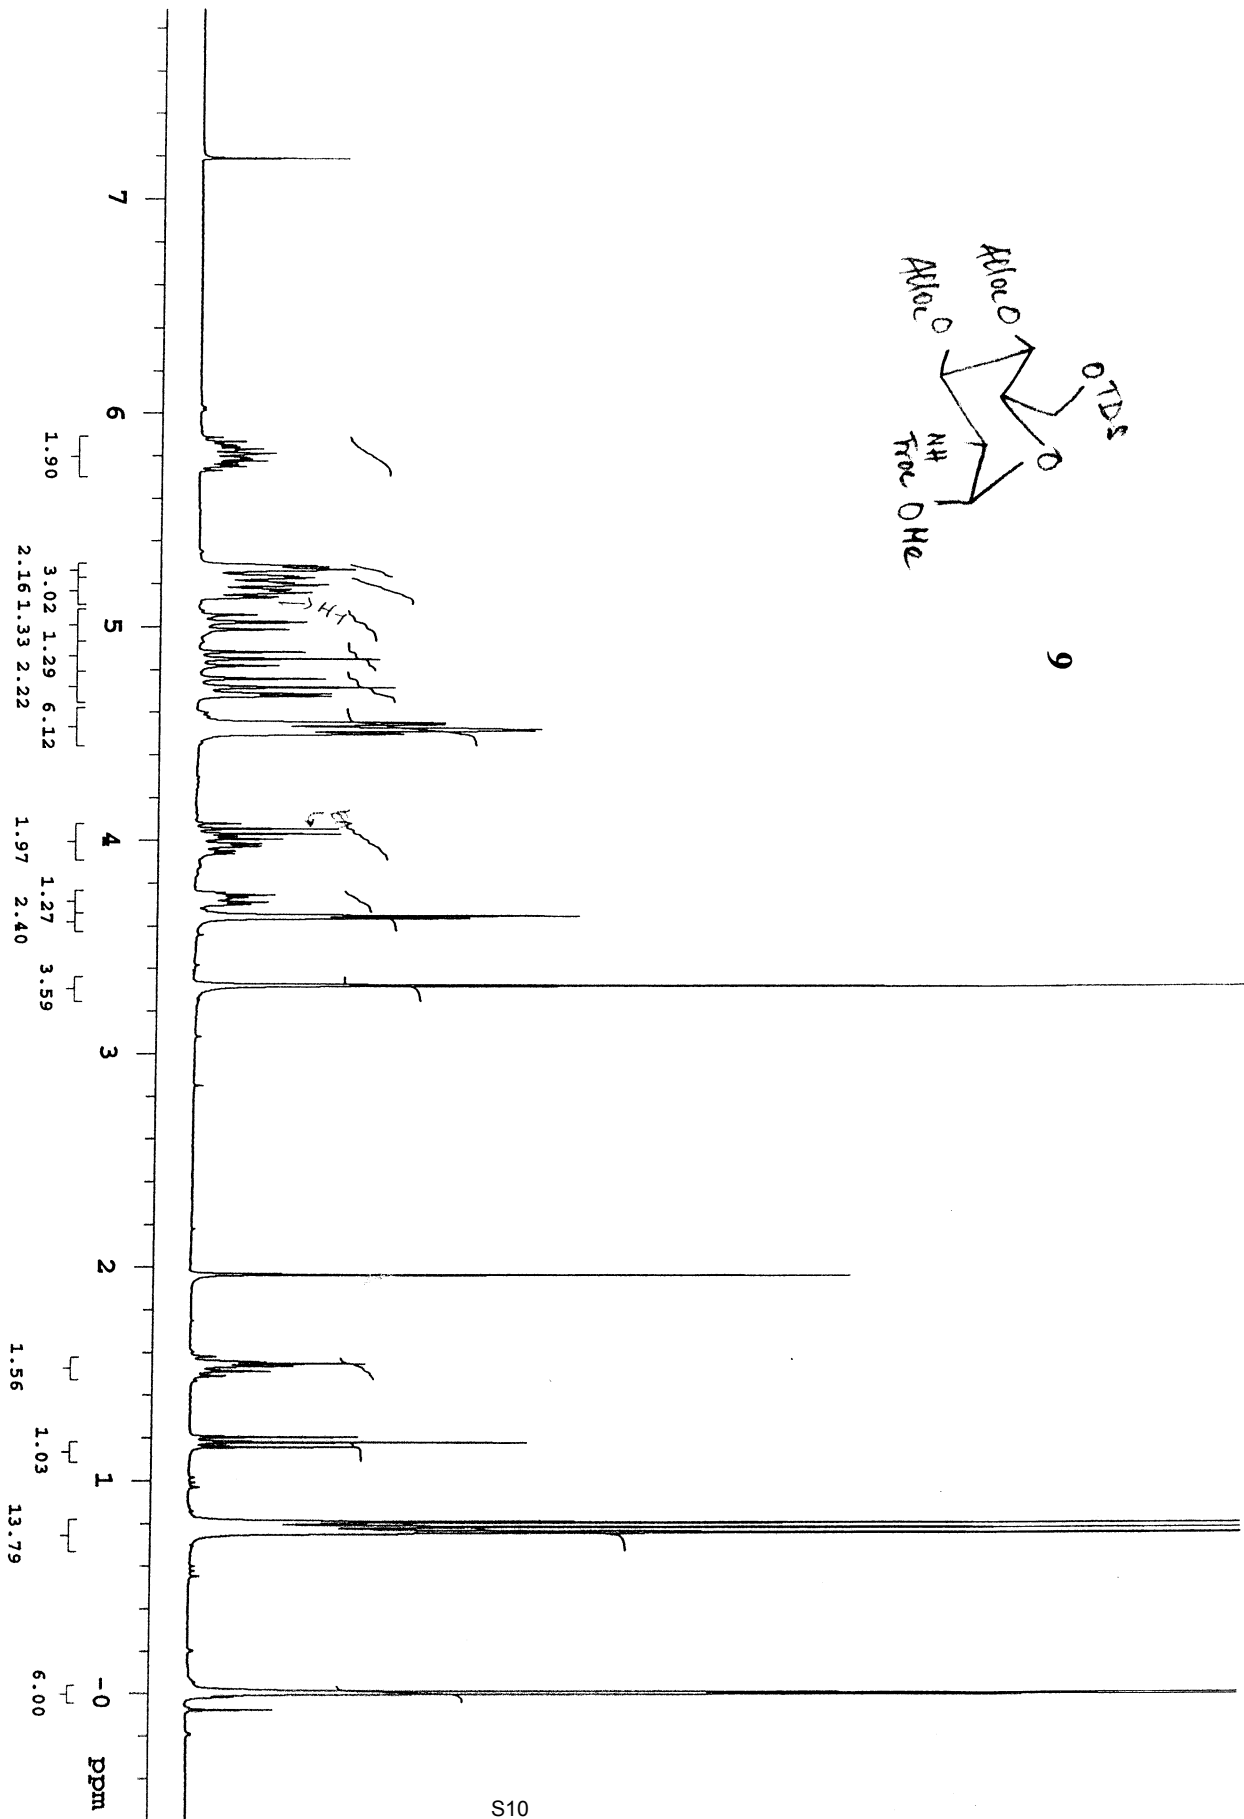

Automation directory: /export/home/walkup/autoc\_2008.06.16\_01  
Sample id : s\_20080630\_21  
Sample : MK/L/05

Pulse Sequence: s2pul  
Solvent: cdcl3  
Temp. 25.0 C / 298.1 K  
Operator: khaiti  
File: 05\_Carbon\_2008Jun30\_01  
Mercury-300BB "merc300"

Relax. delay 1.000 sec  
Pulse 45.0 degrees  
Acq. time 1.301 sec  
Width 18115.9 Hz  
512 repetitions  
OBSERVE C13, 75.4525480 MHz  
DECOUPLE H1, 300.0720883 MHz  
Power 37 dB  
continuously on  
WALTZ-16 modulated  
DATA PROCESSING  
Line broadening 0.5 Hz  
FT size 65536  
Total time 20 min, 17 sec

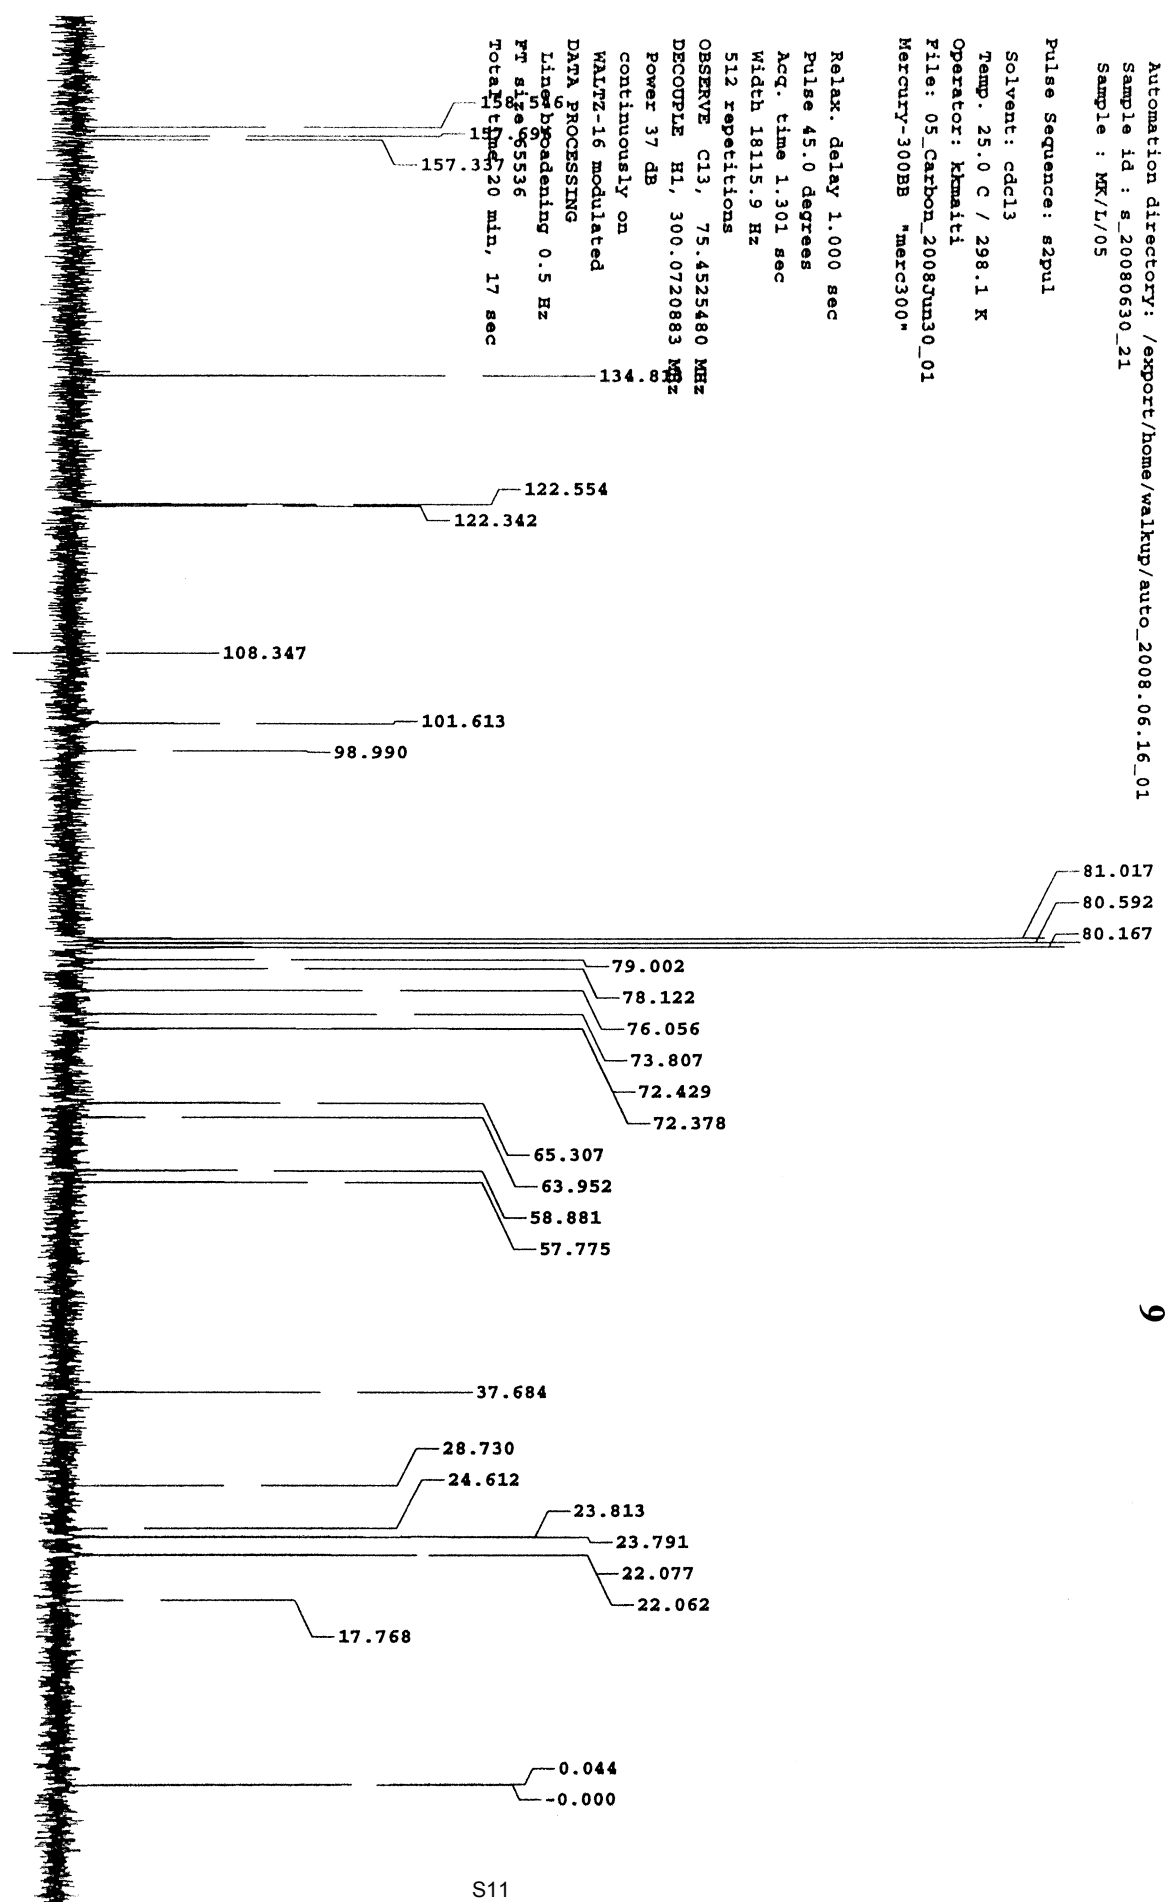

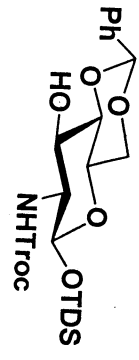

11

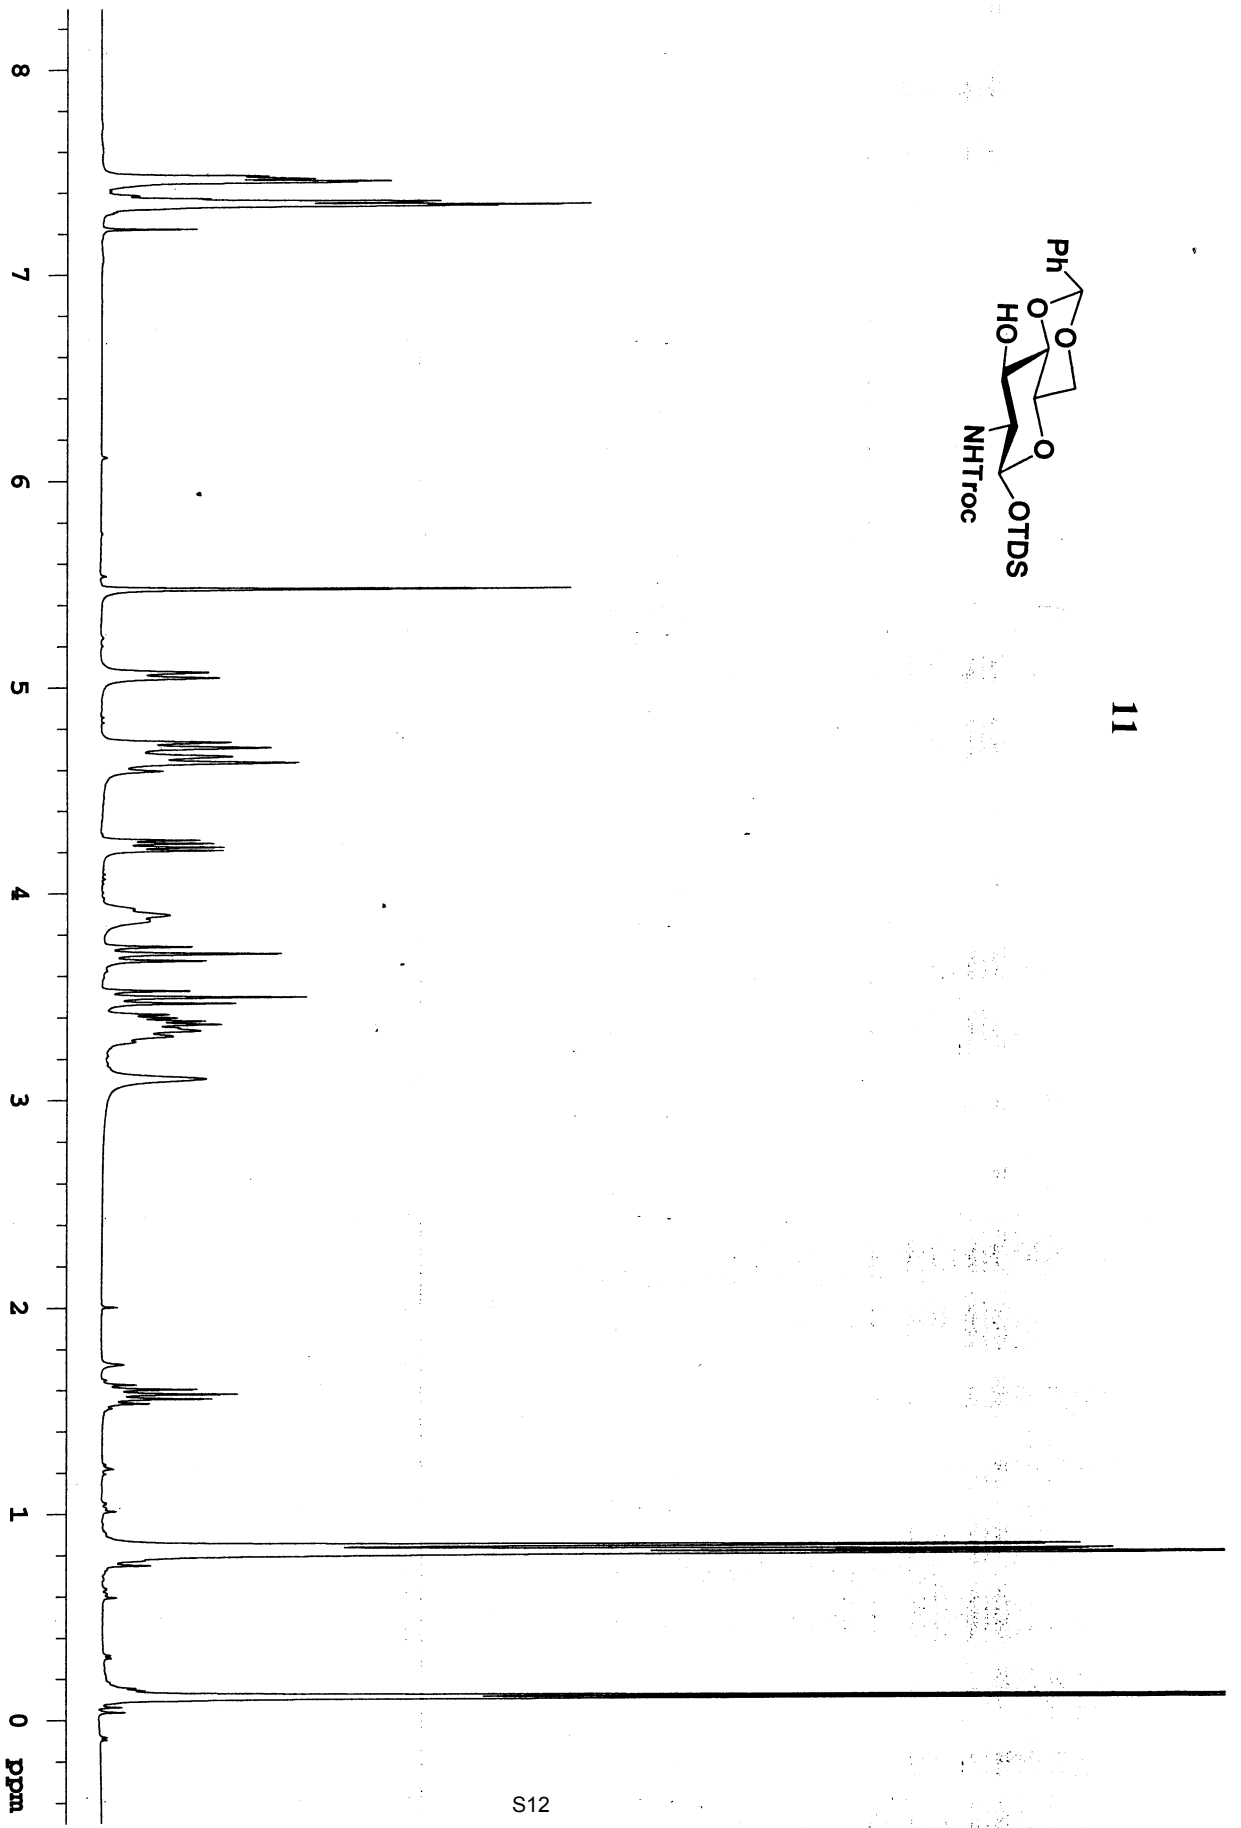



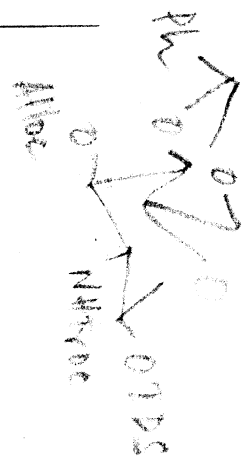

12

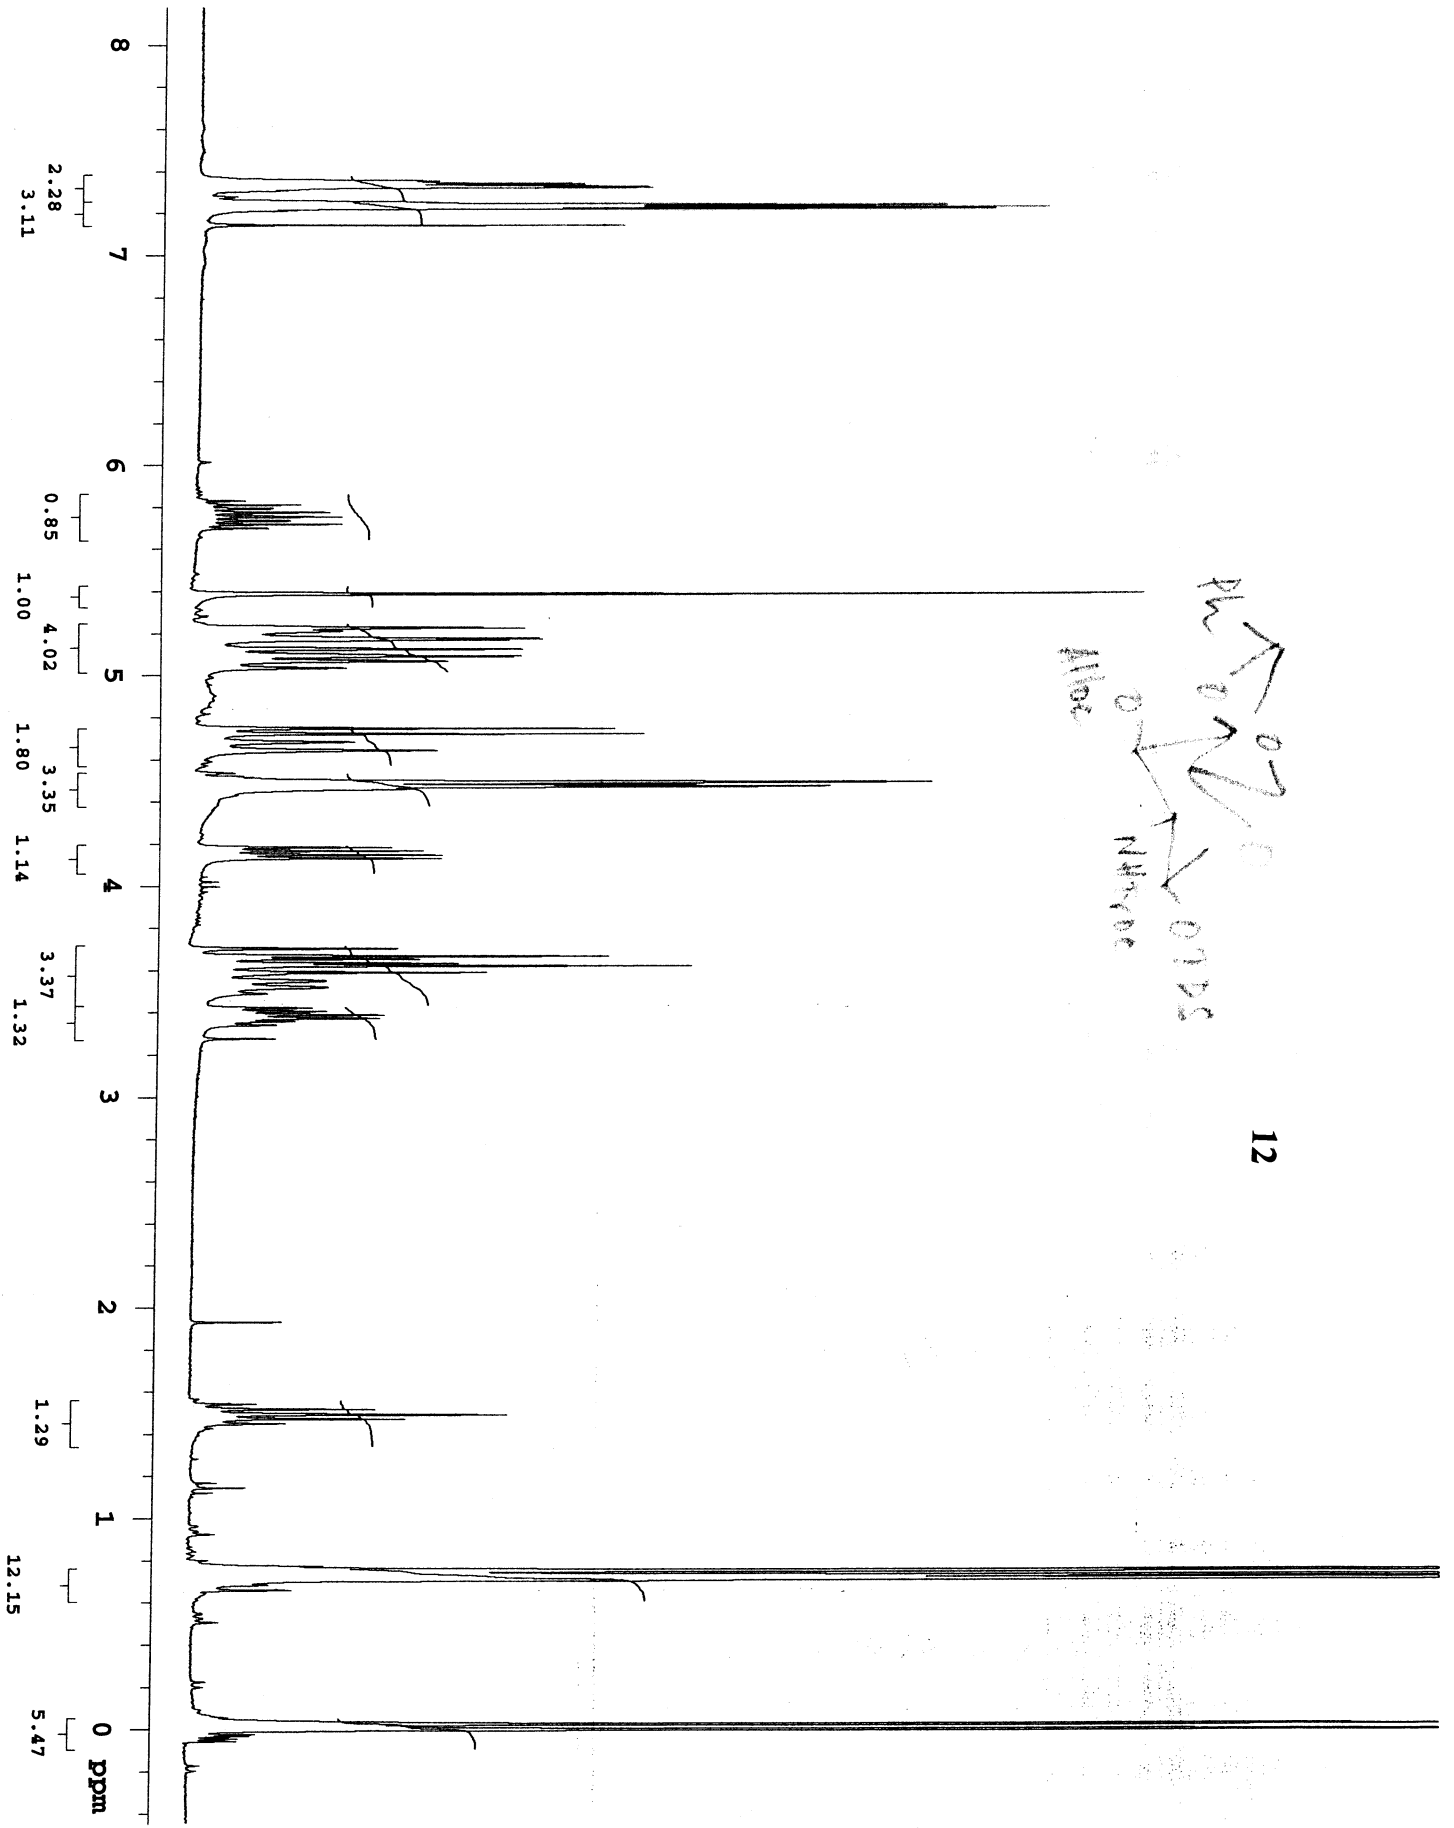

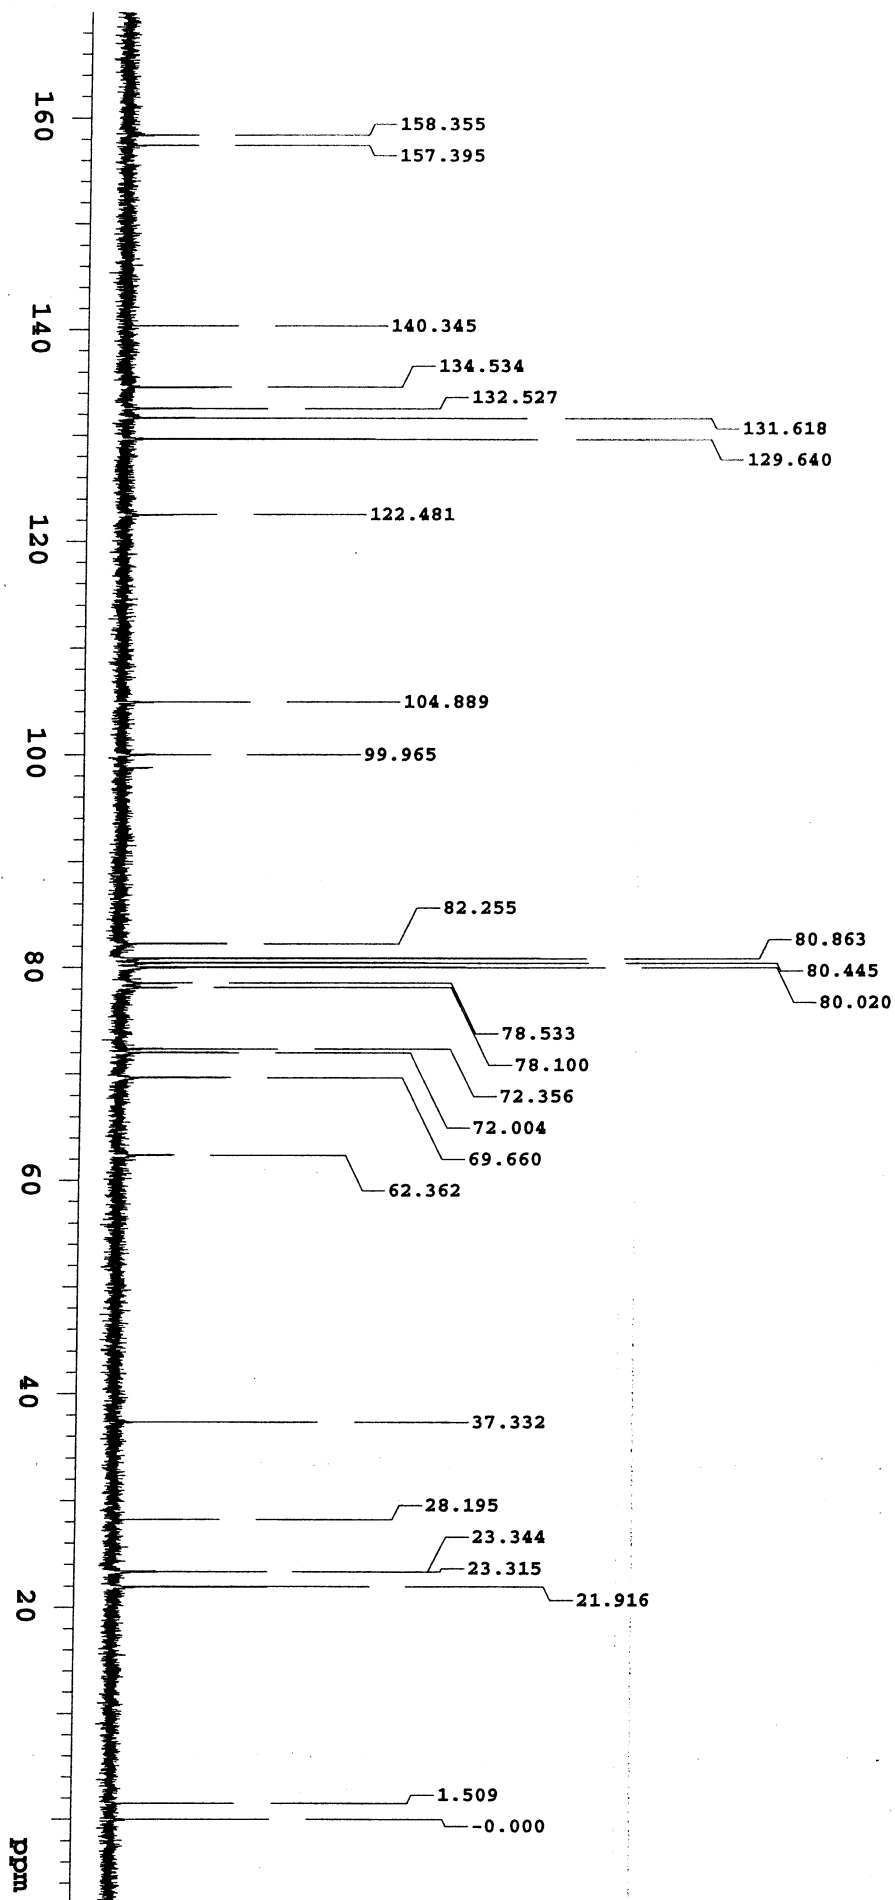

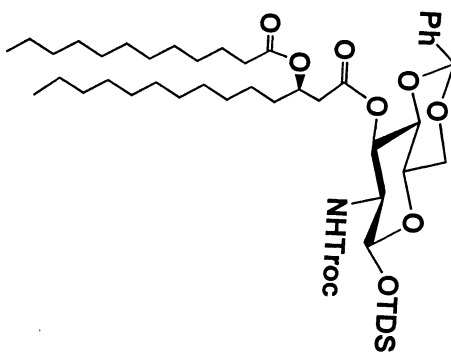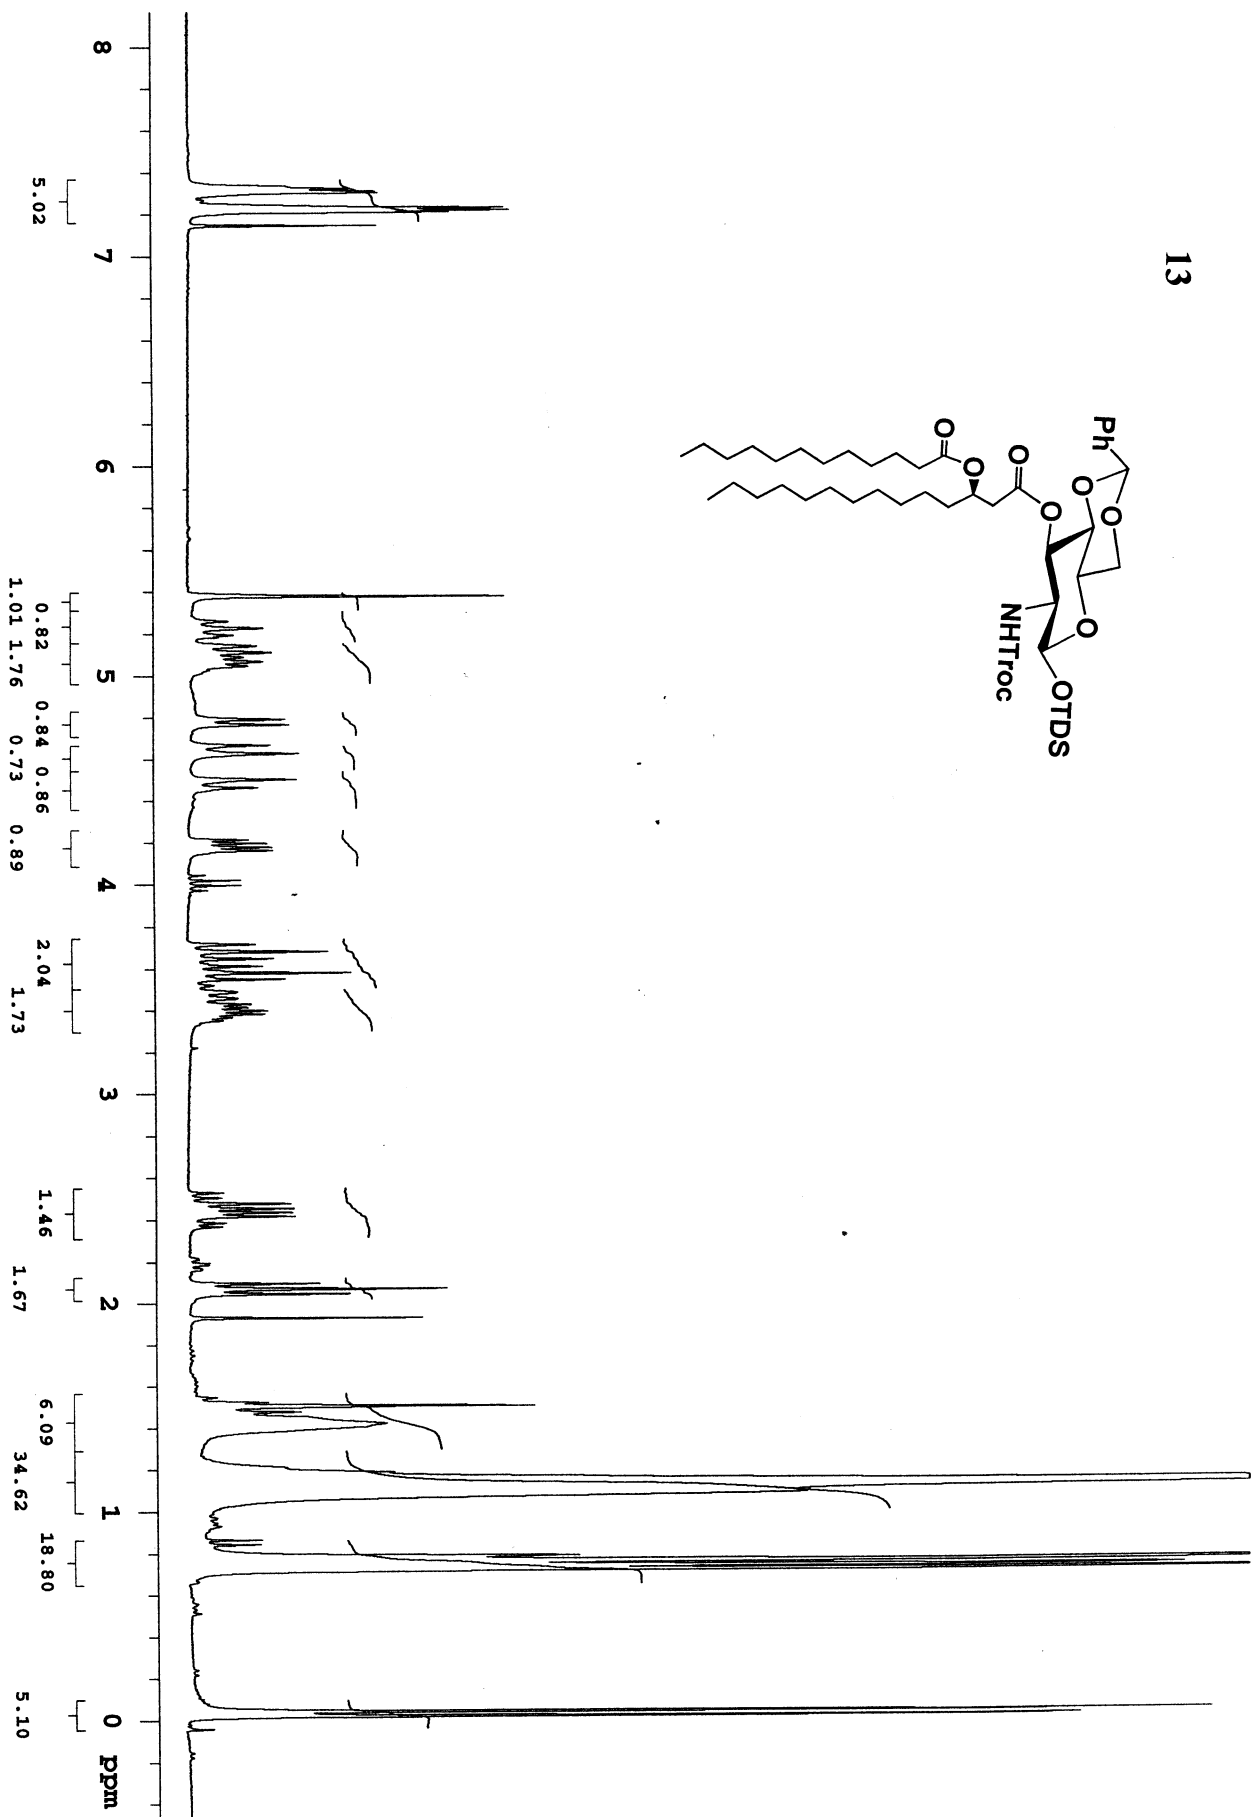



220  
200  
180  
160  
140  
120  
100  
80  
60  
40  
20  
0 ppm

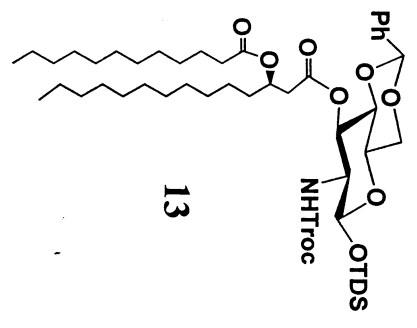

Std proton

14

File: MK106\_Proton\_20080710\_01

Pulse Sequence: s2pul

Solvent: cdcl3

Temp. 25.0 C / 298.1 K

Operator: kmalti

File: MK106\_Proton\_20080710\_01

INOVA-500 "nmr1"

Relax. delay 1.000 sec

Pulse 45.0 degrees

Acq. time 2.049 sec

Width 7996.0 Hz

32 repetitions

OBSERVE H1, 499.8658126 MHz

DATA PROCESSING

Line broadening 0.2 Hz

FT size 65536

Total time 1 min, 43 sec

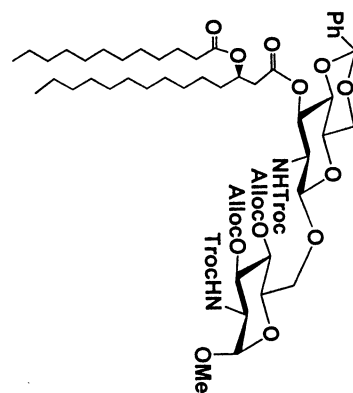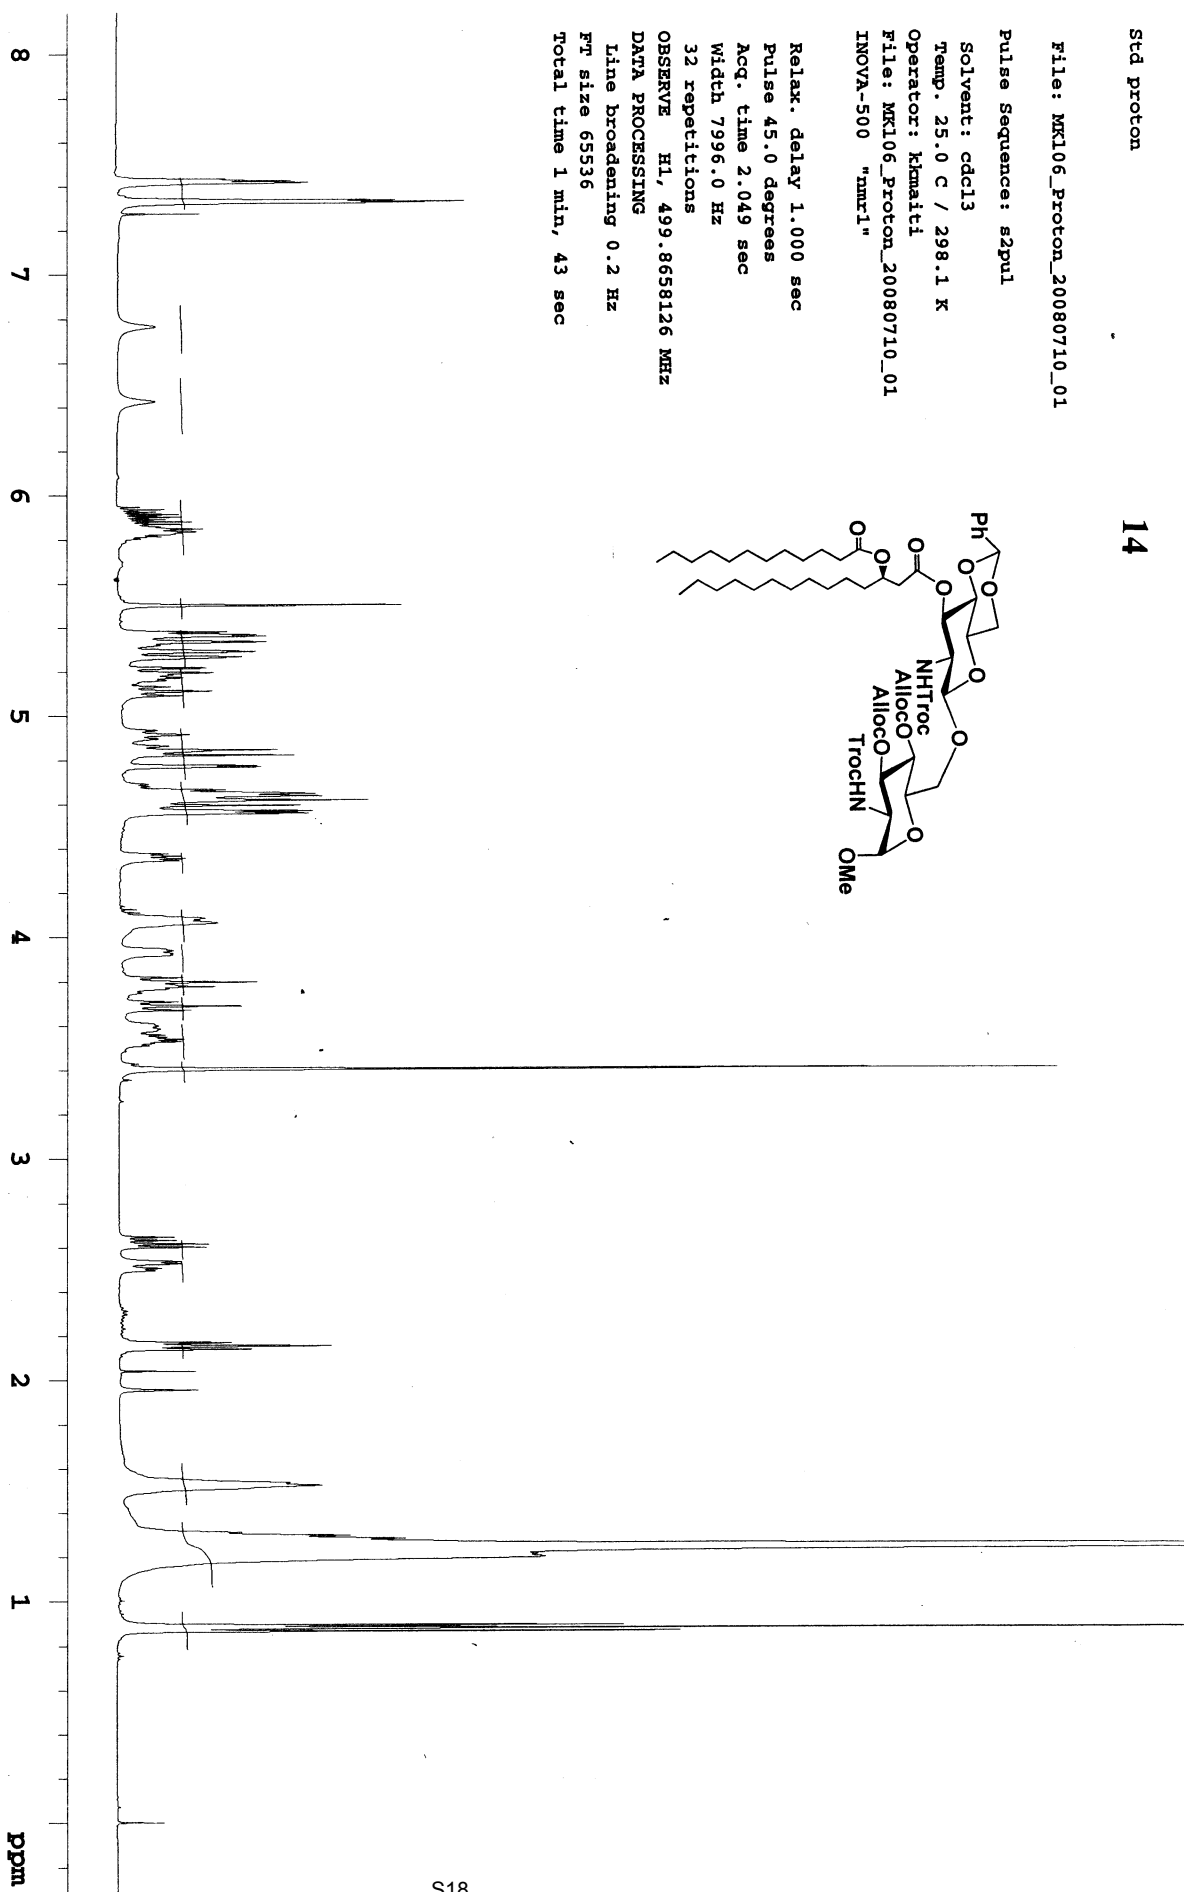

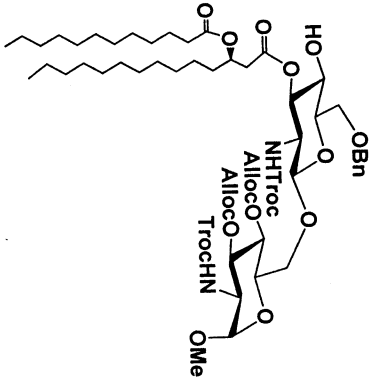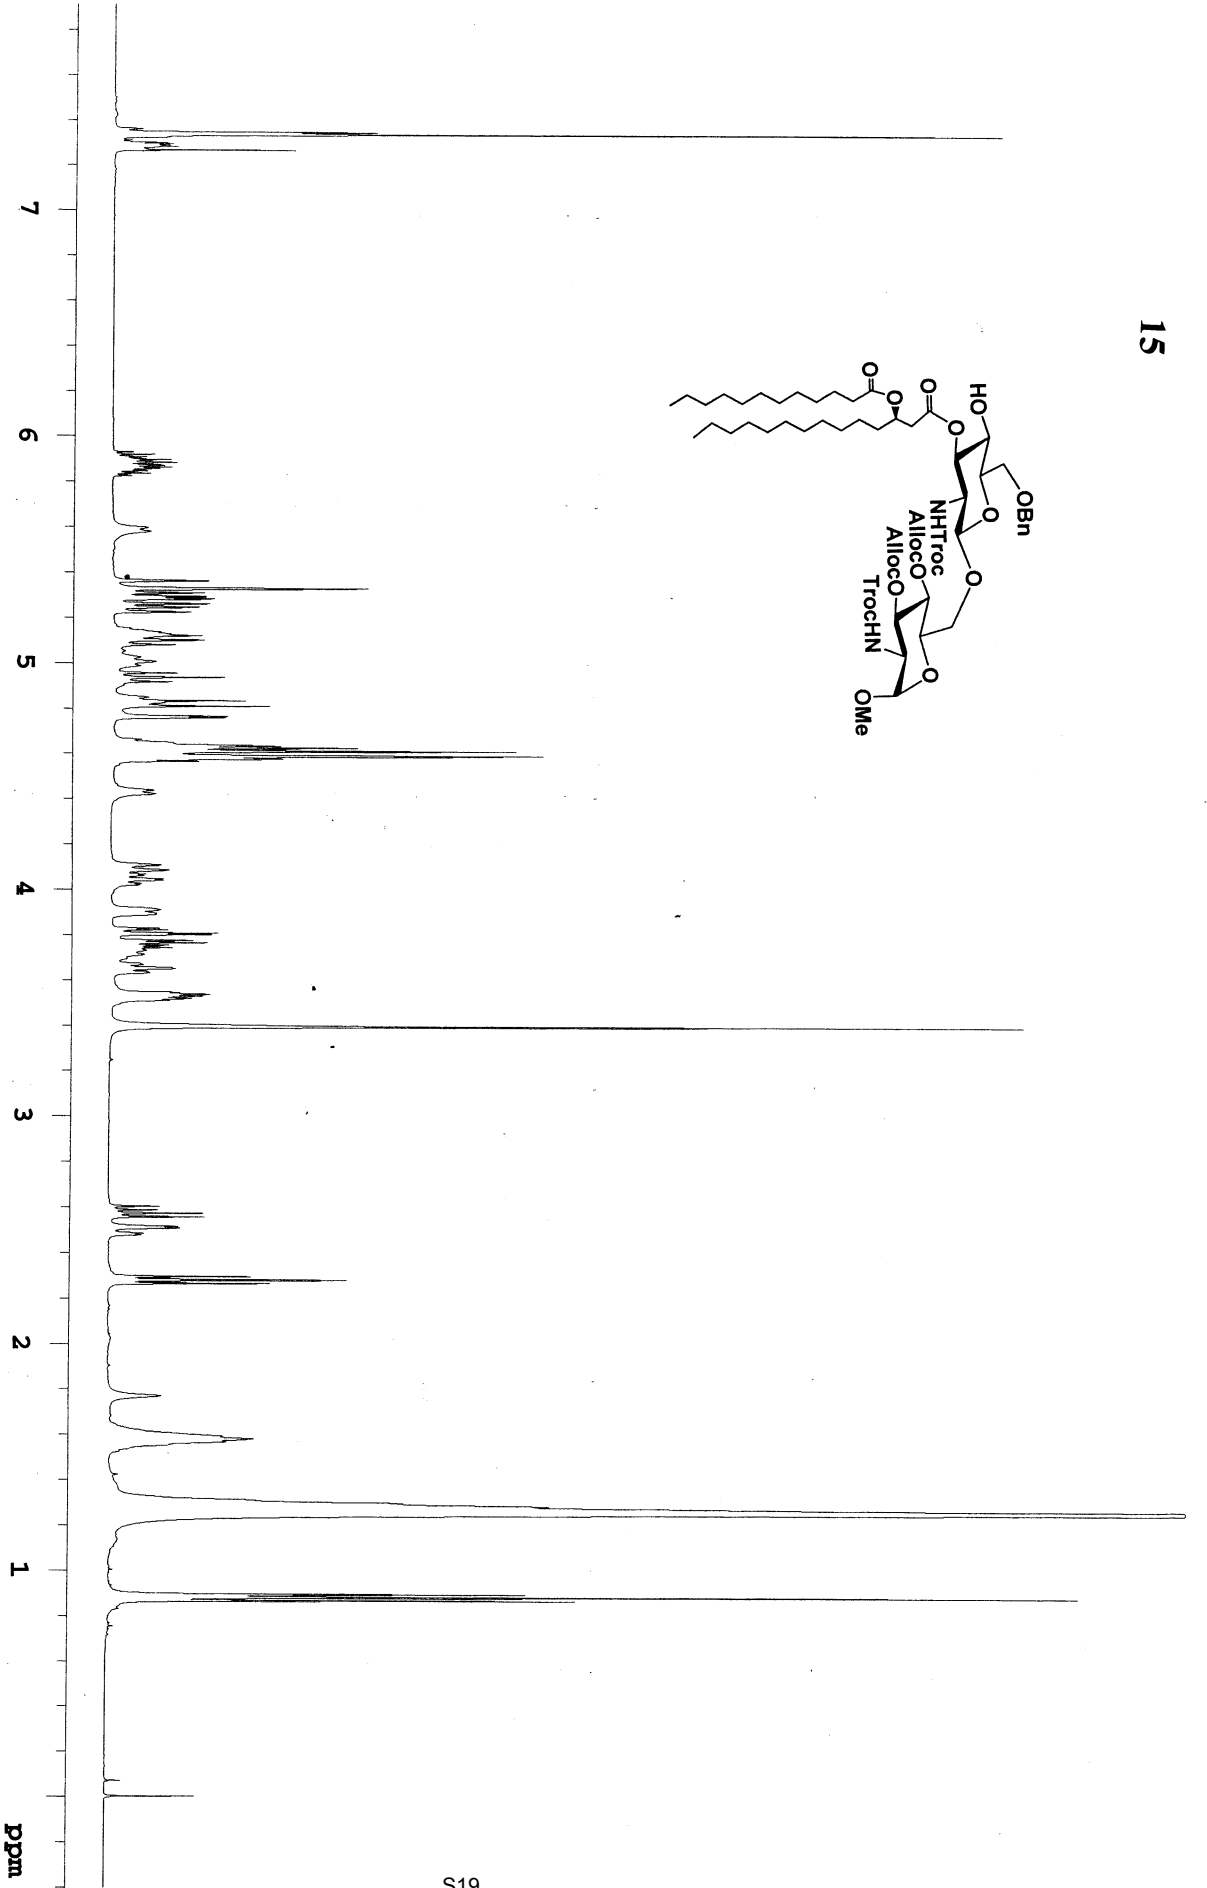

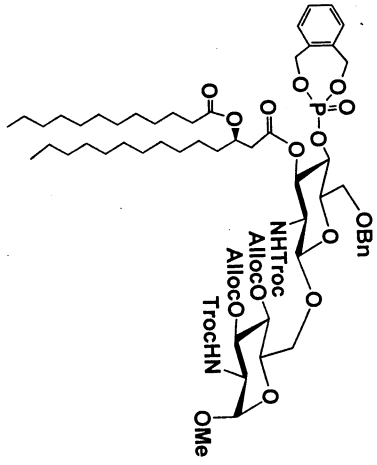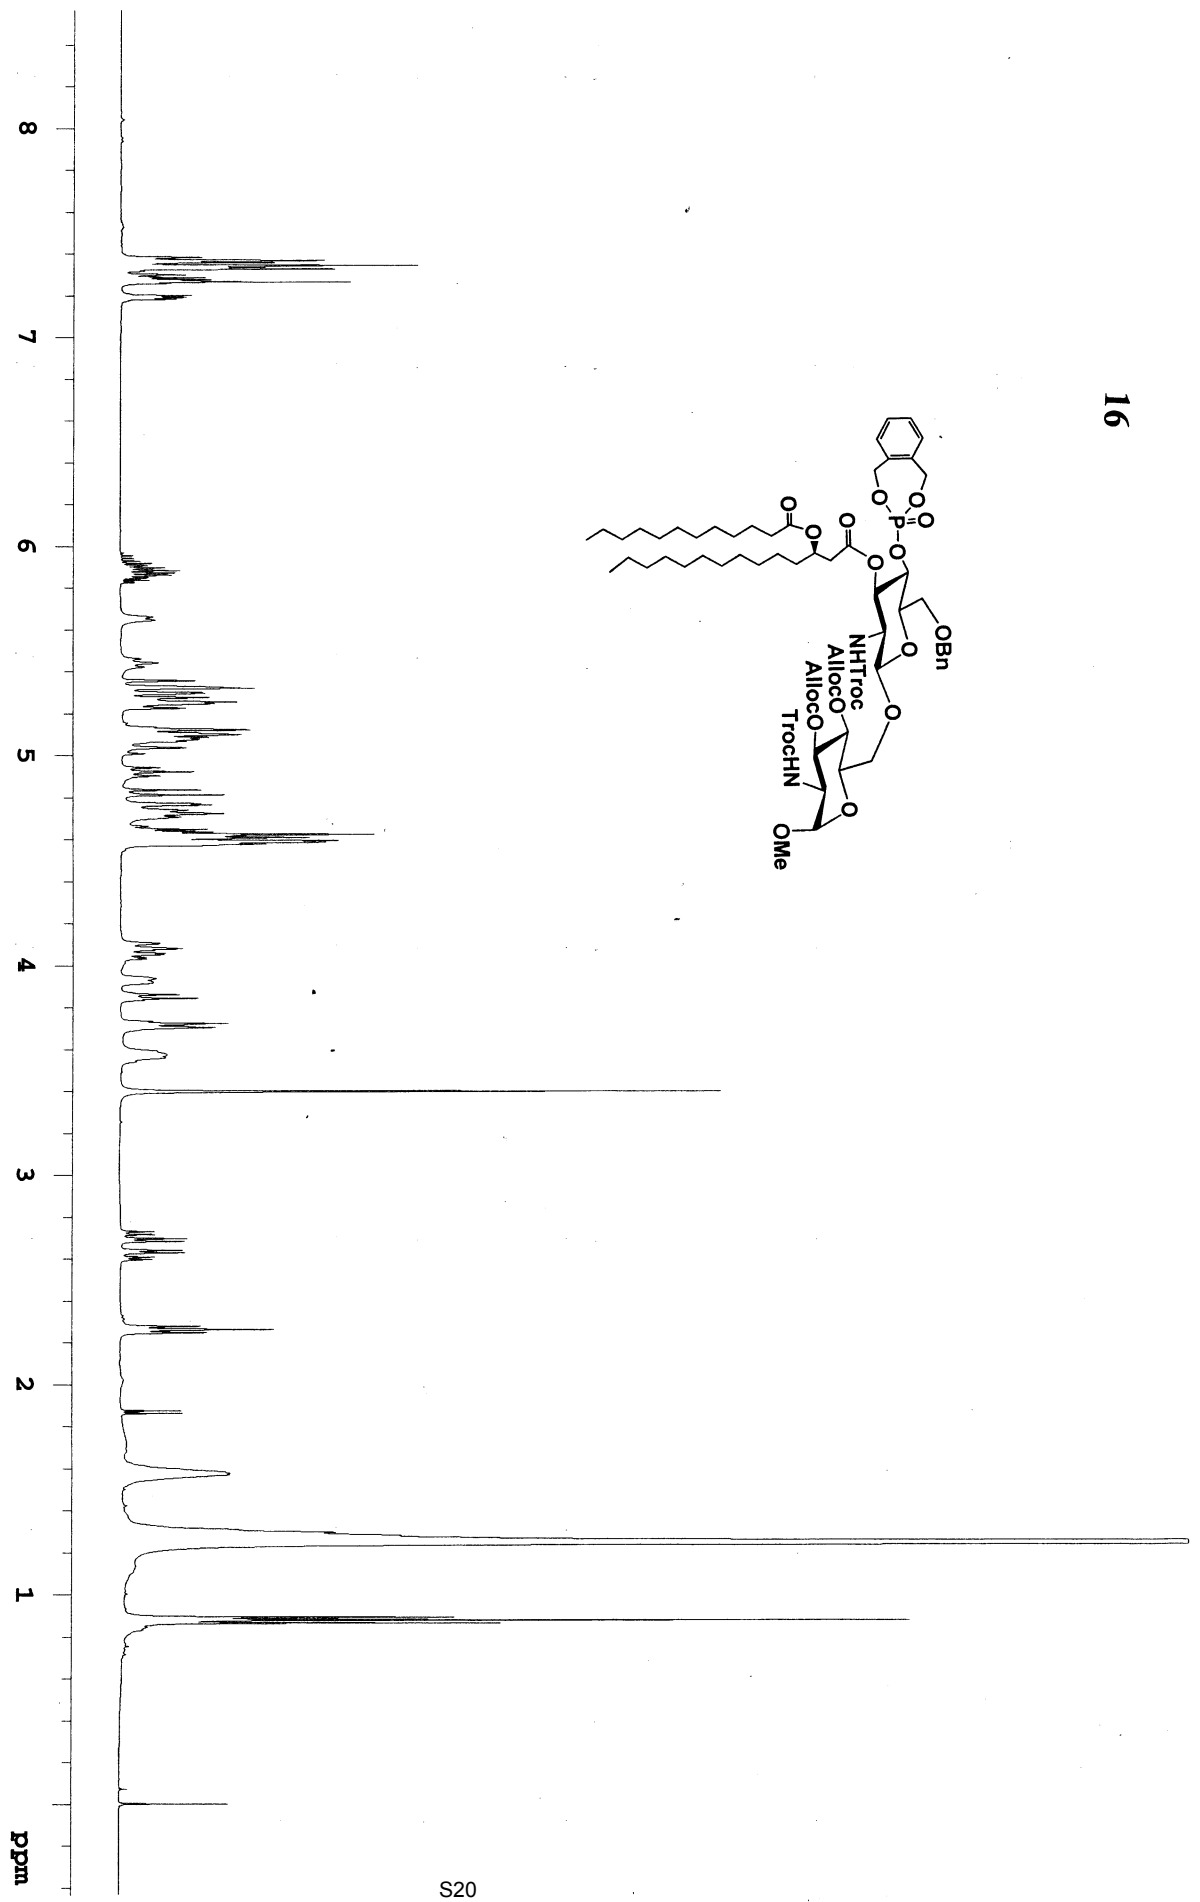

17

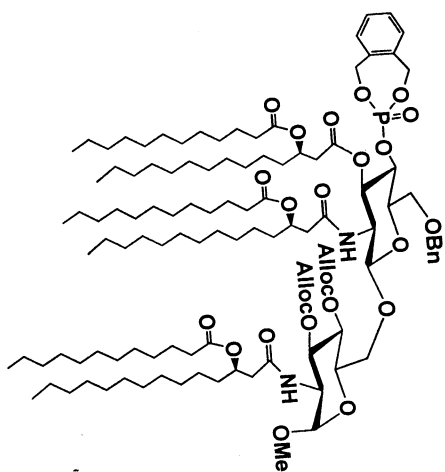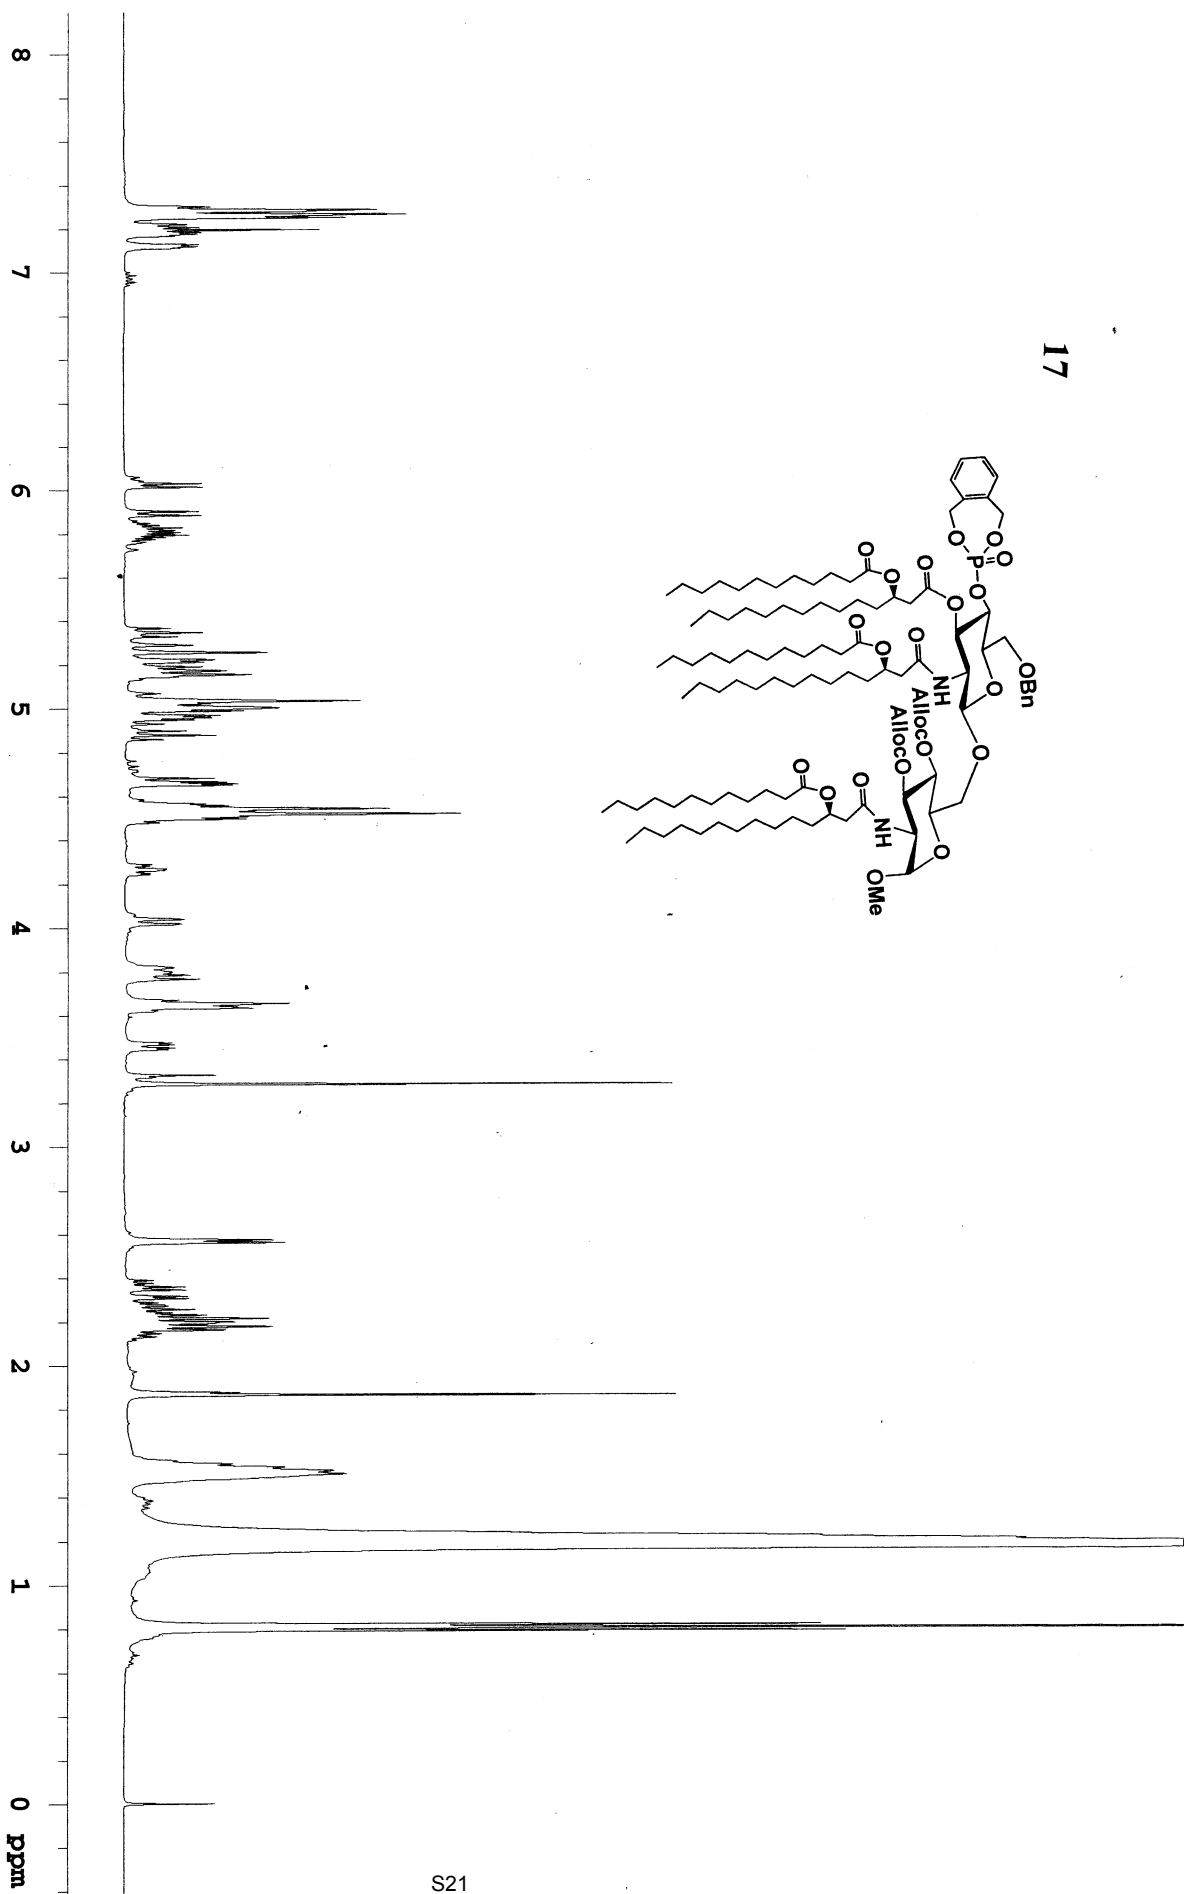

18

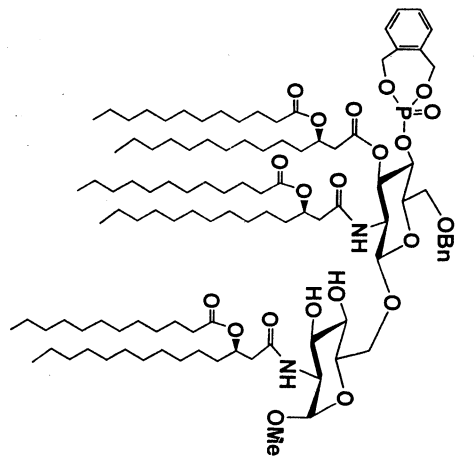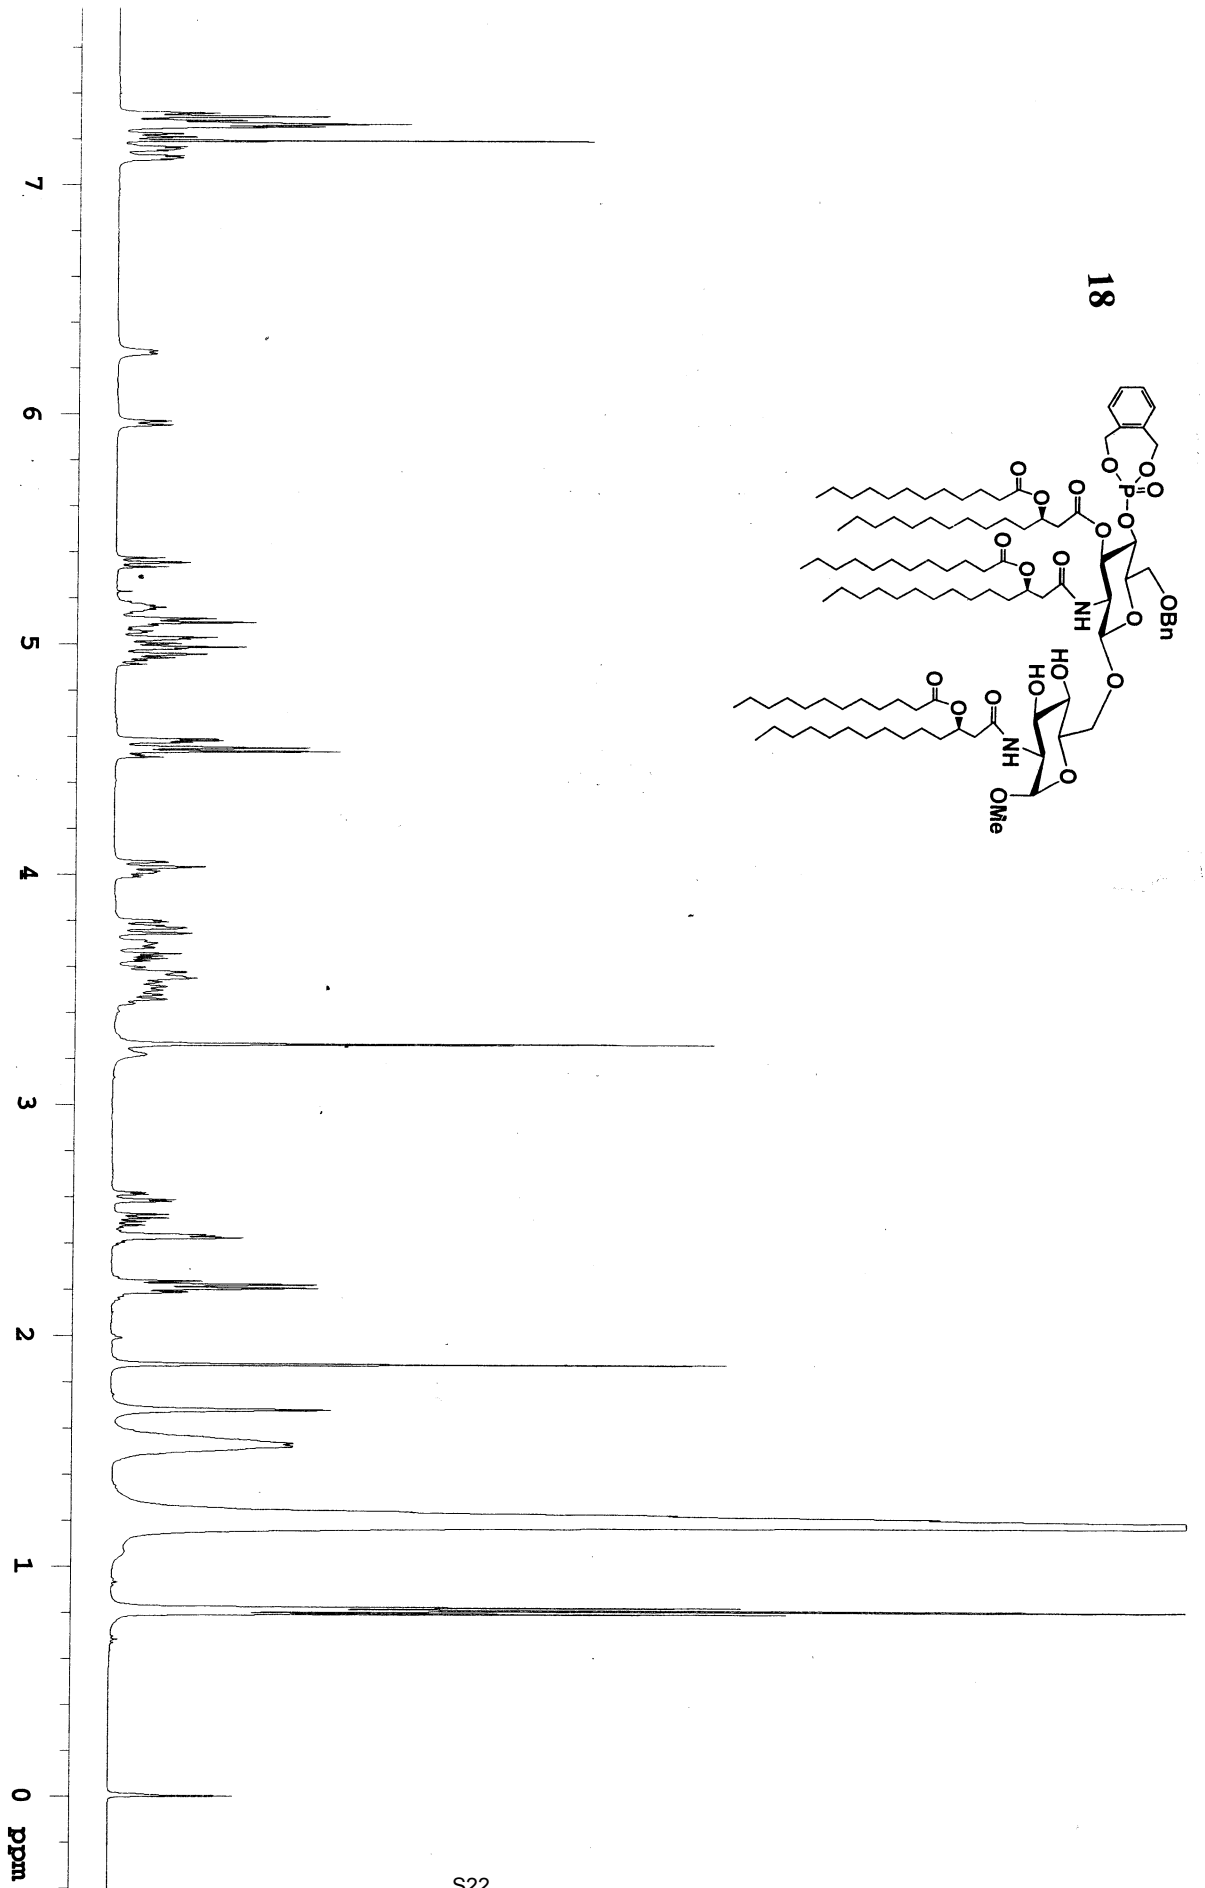

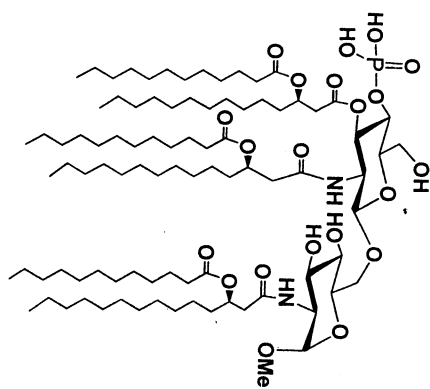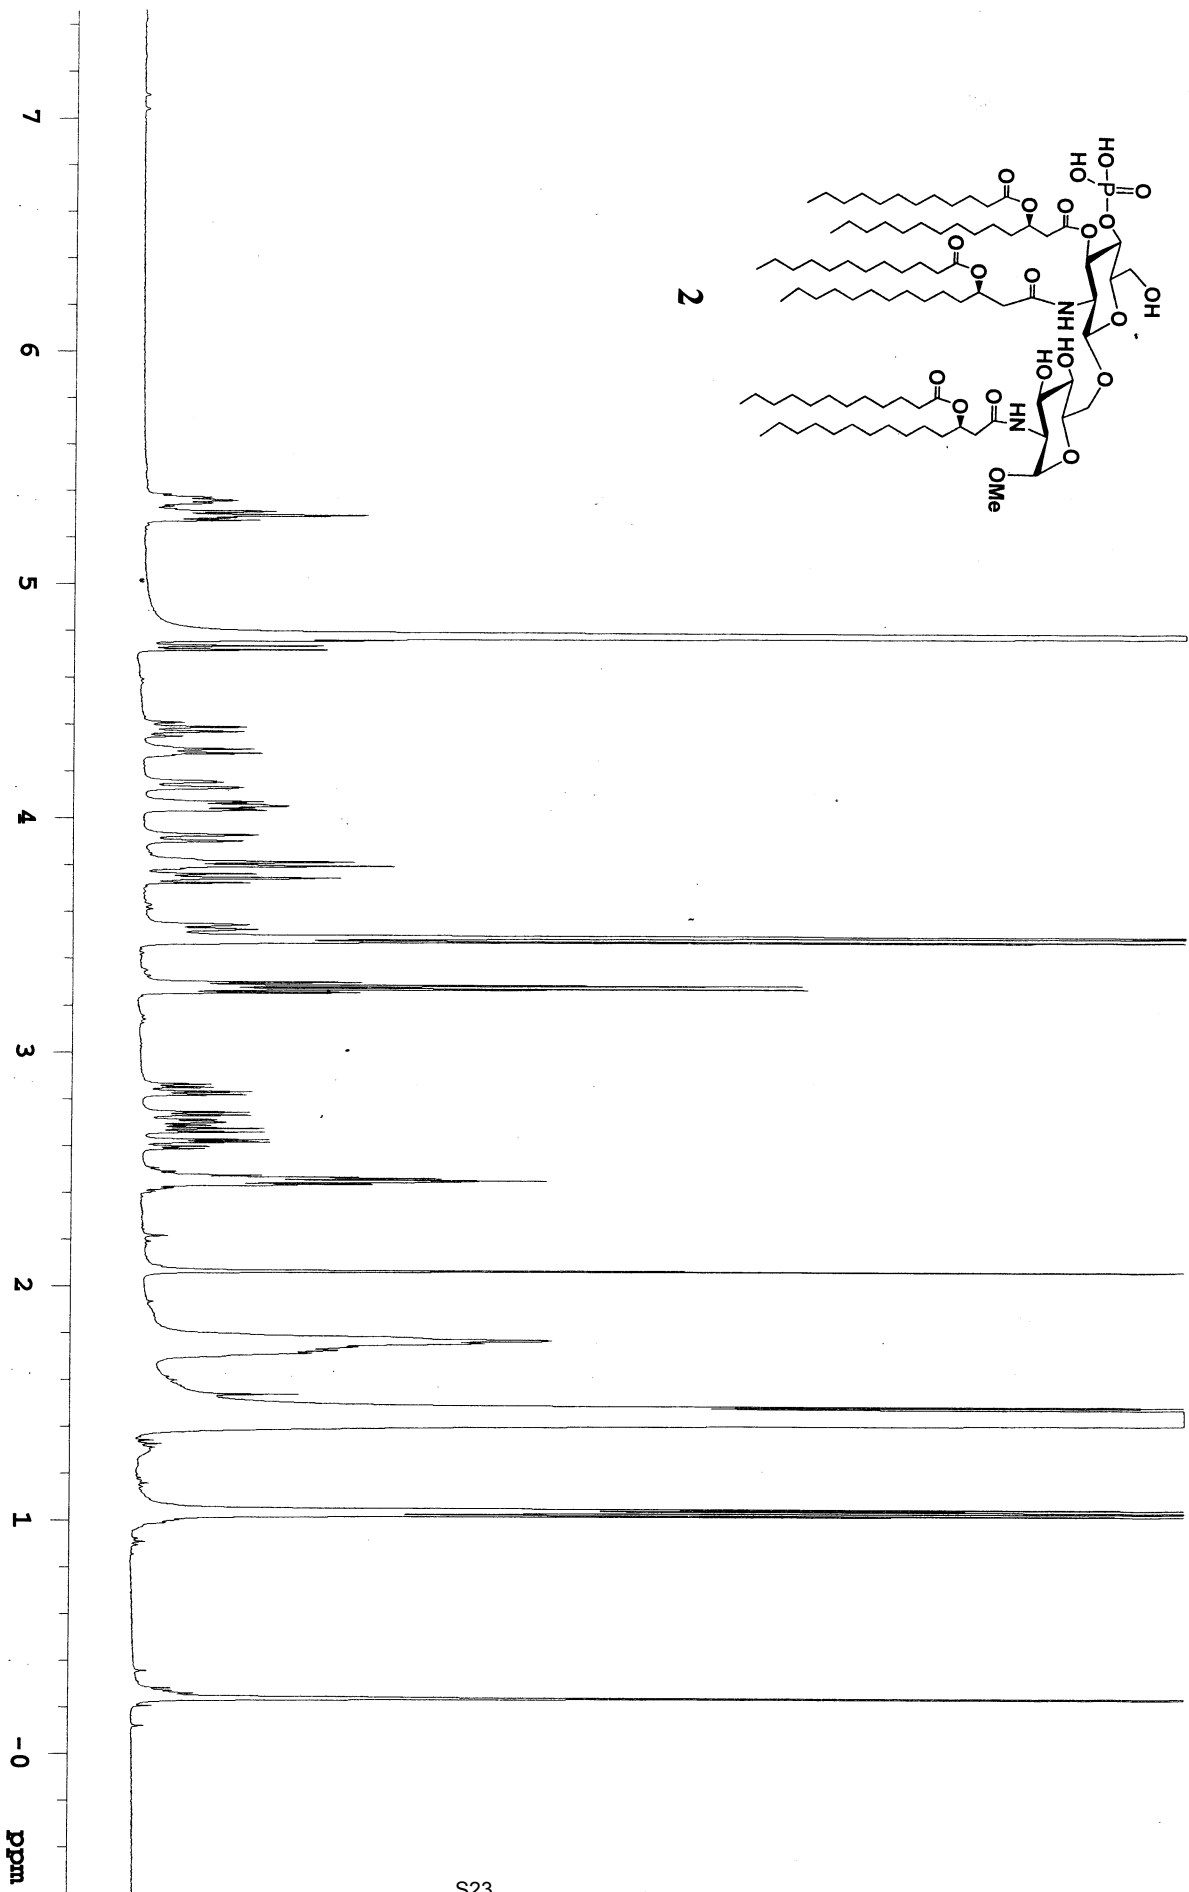

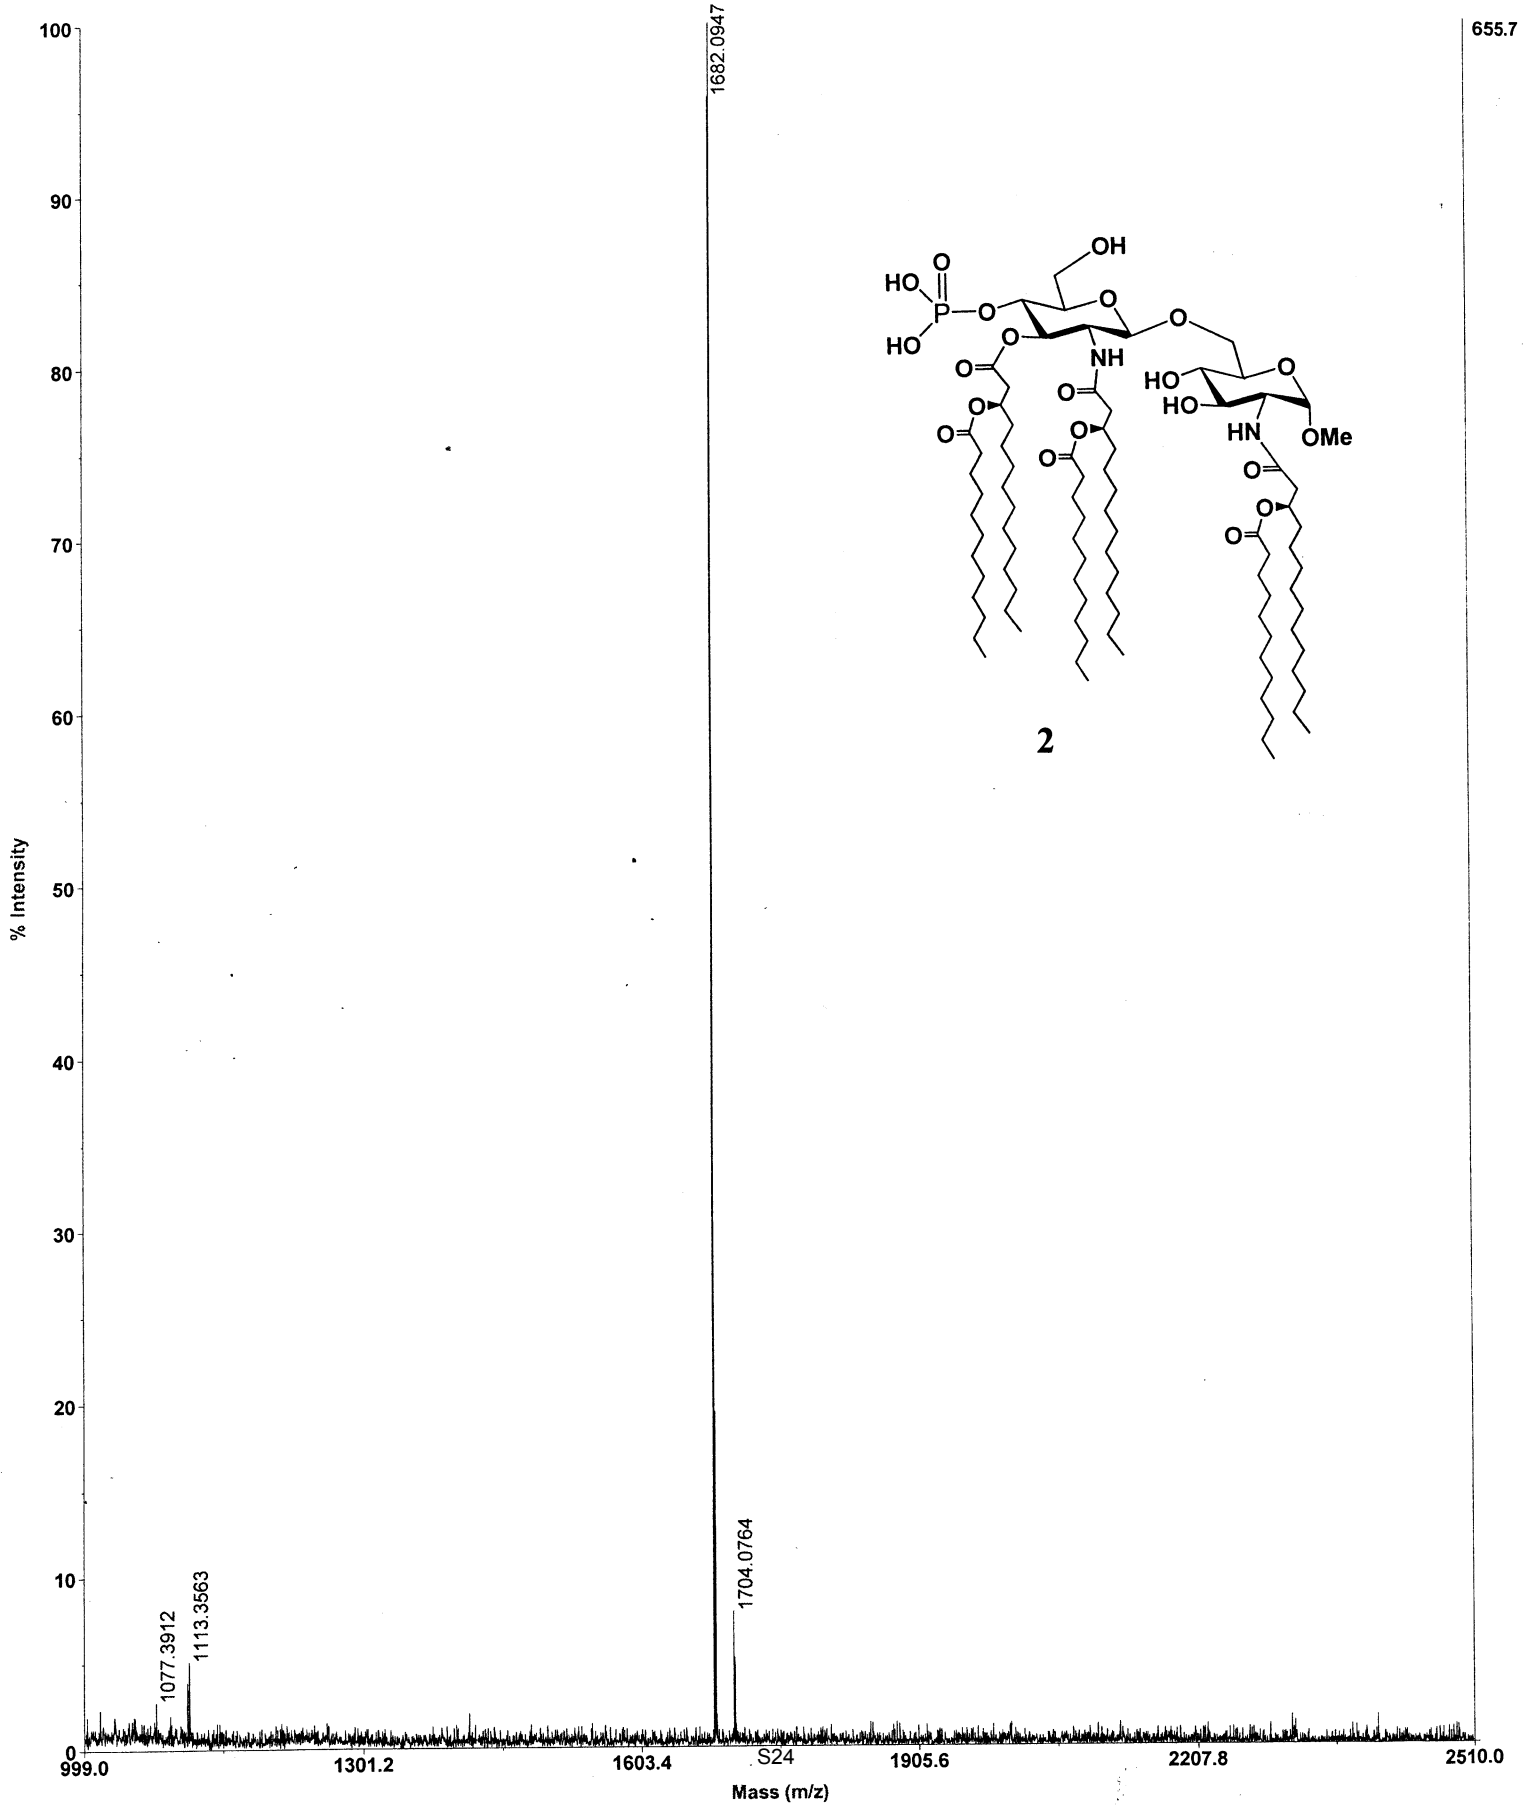





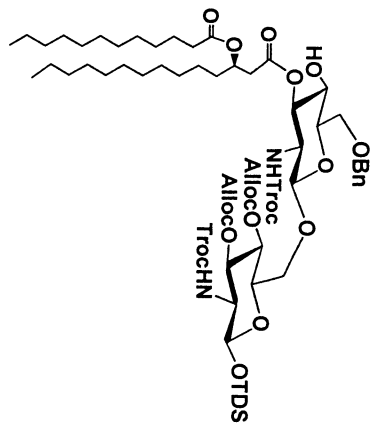

21

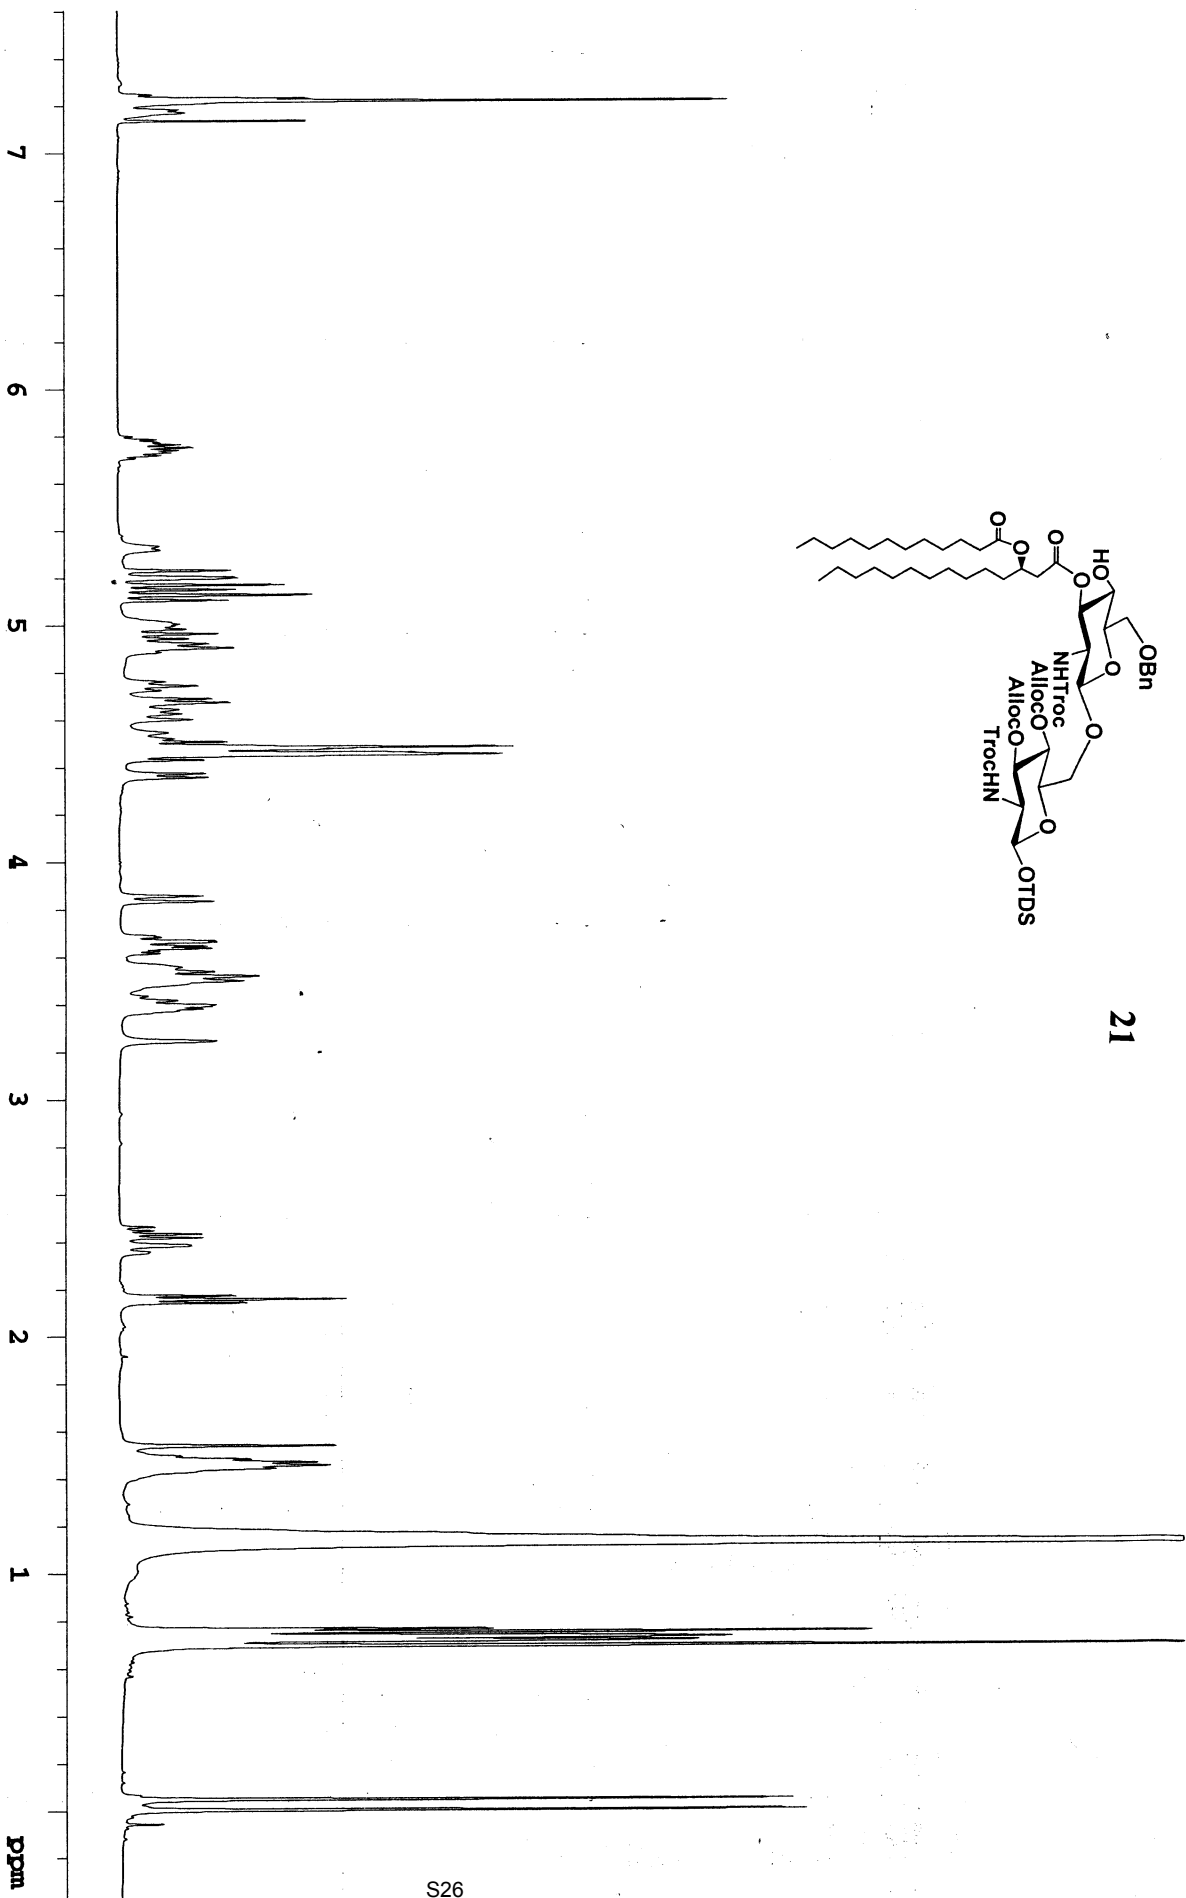

22

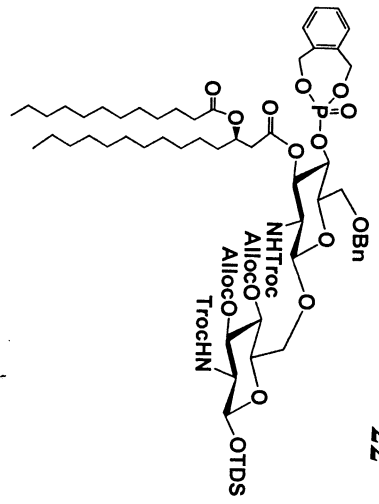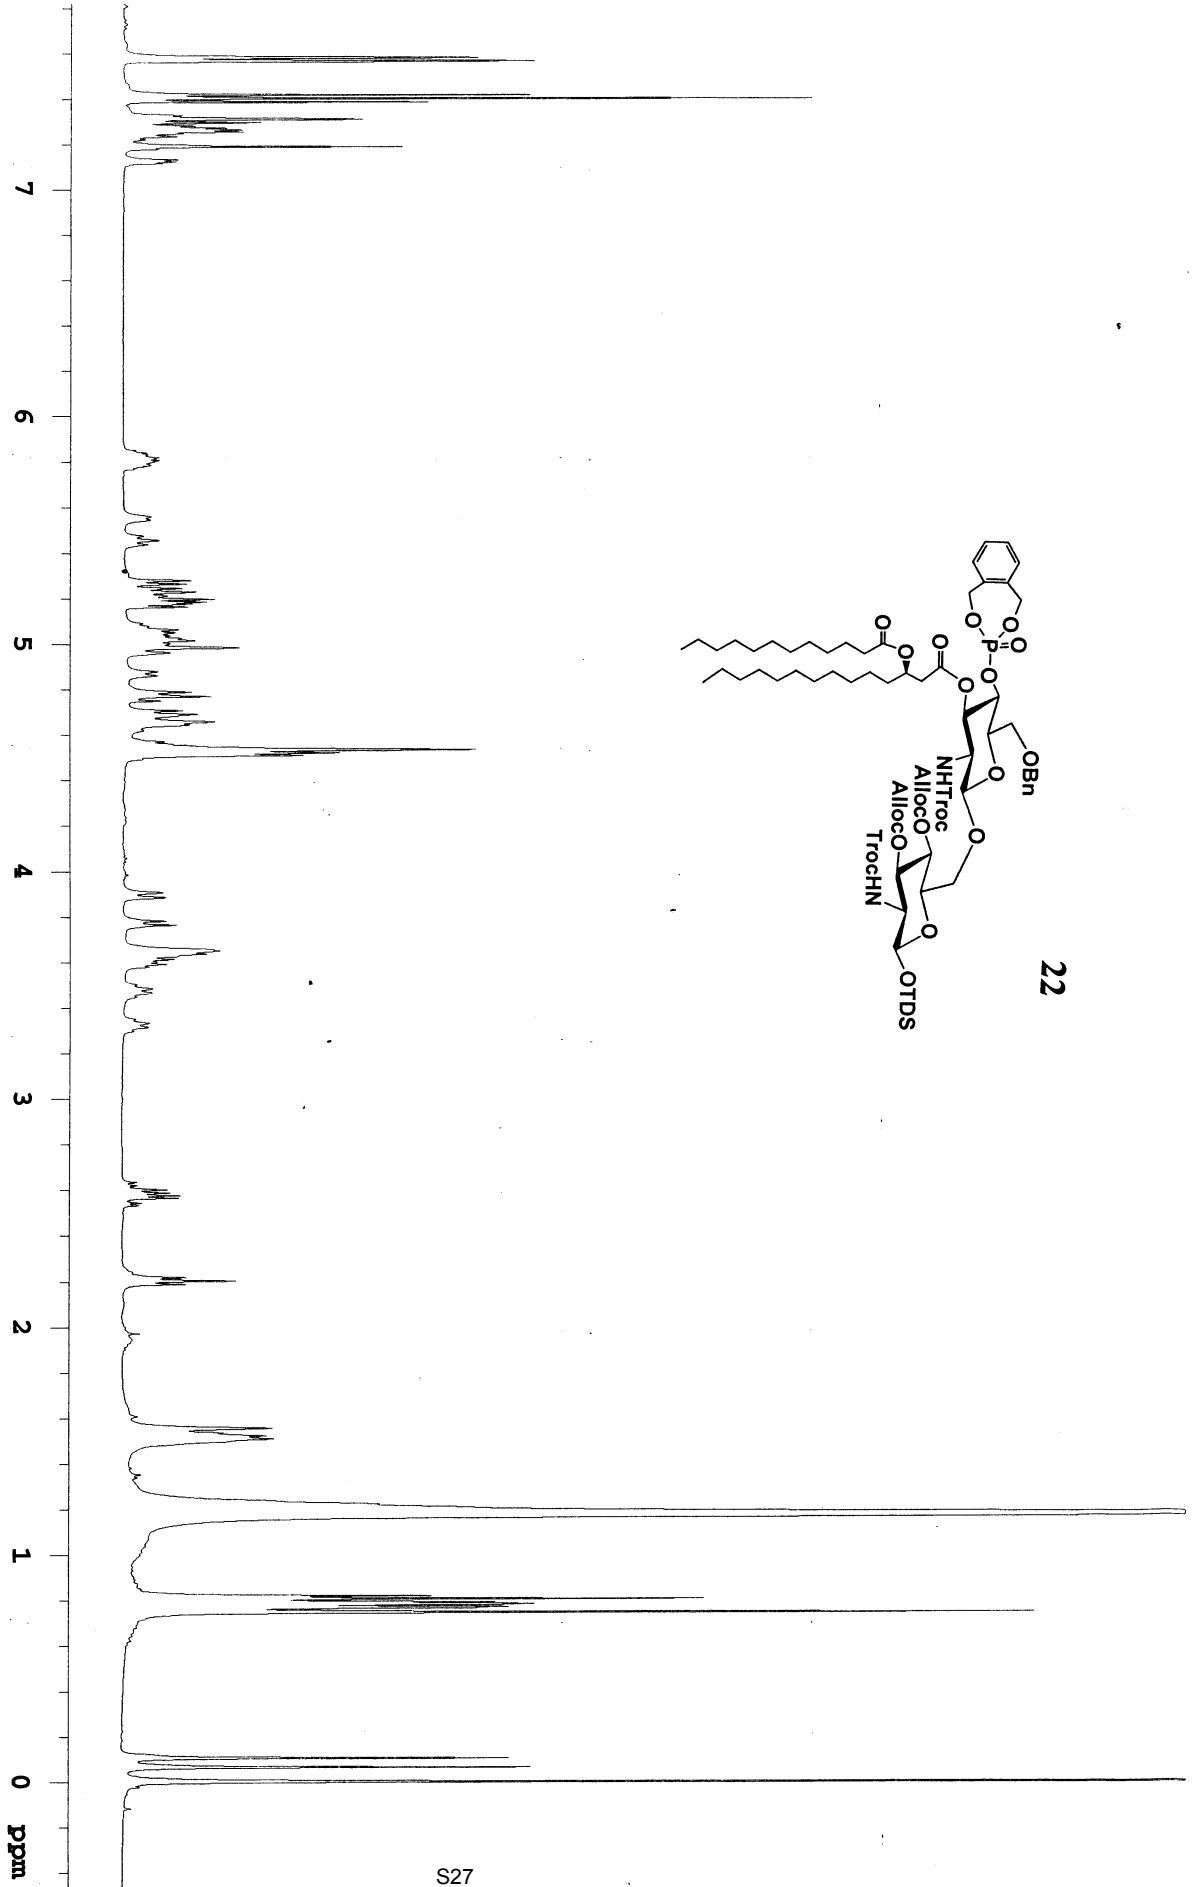

23

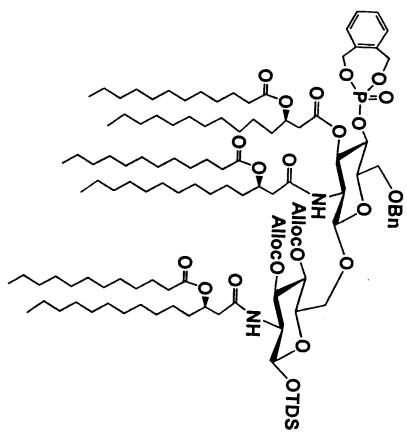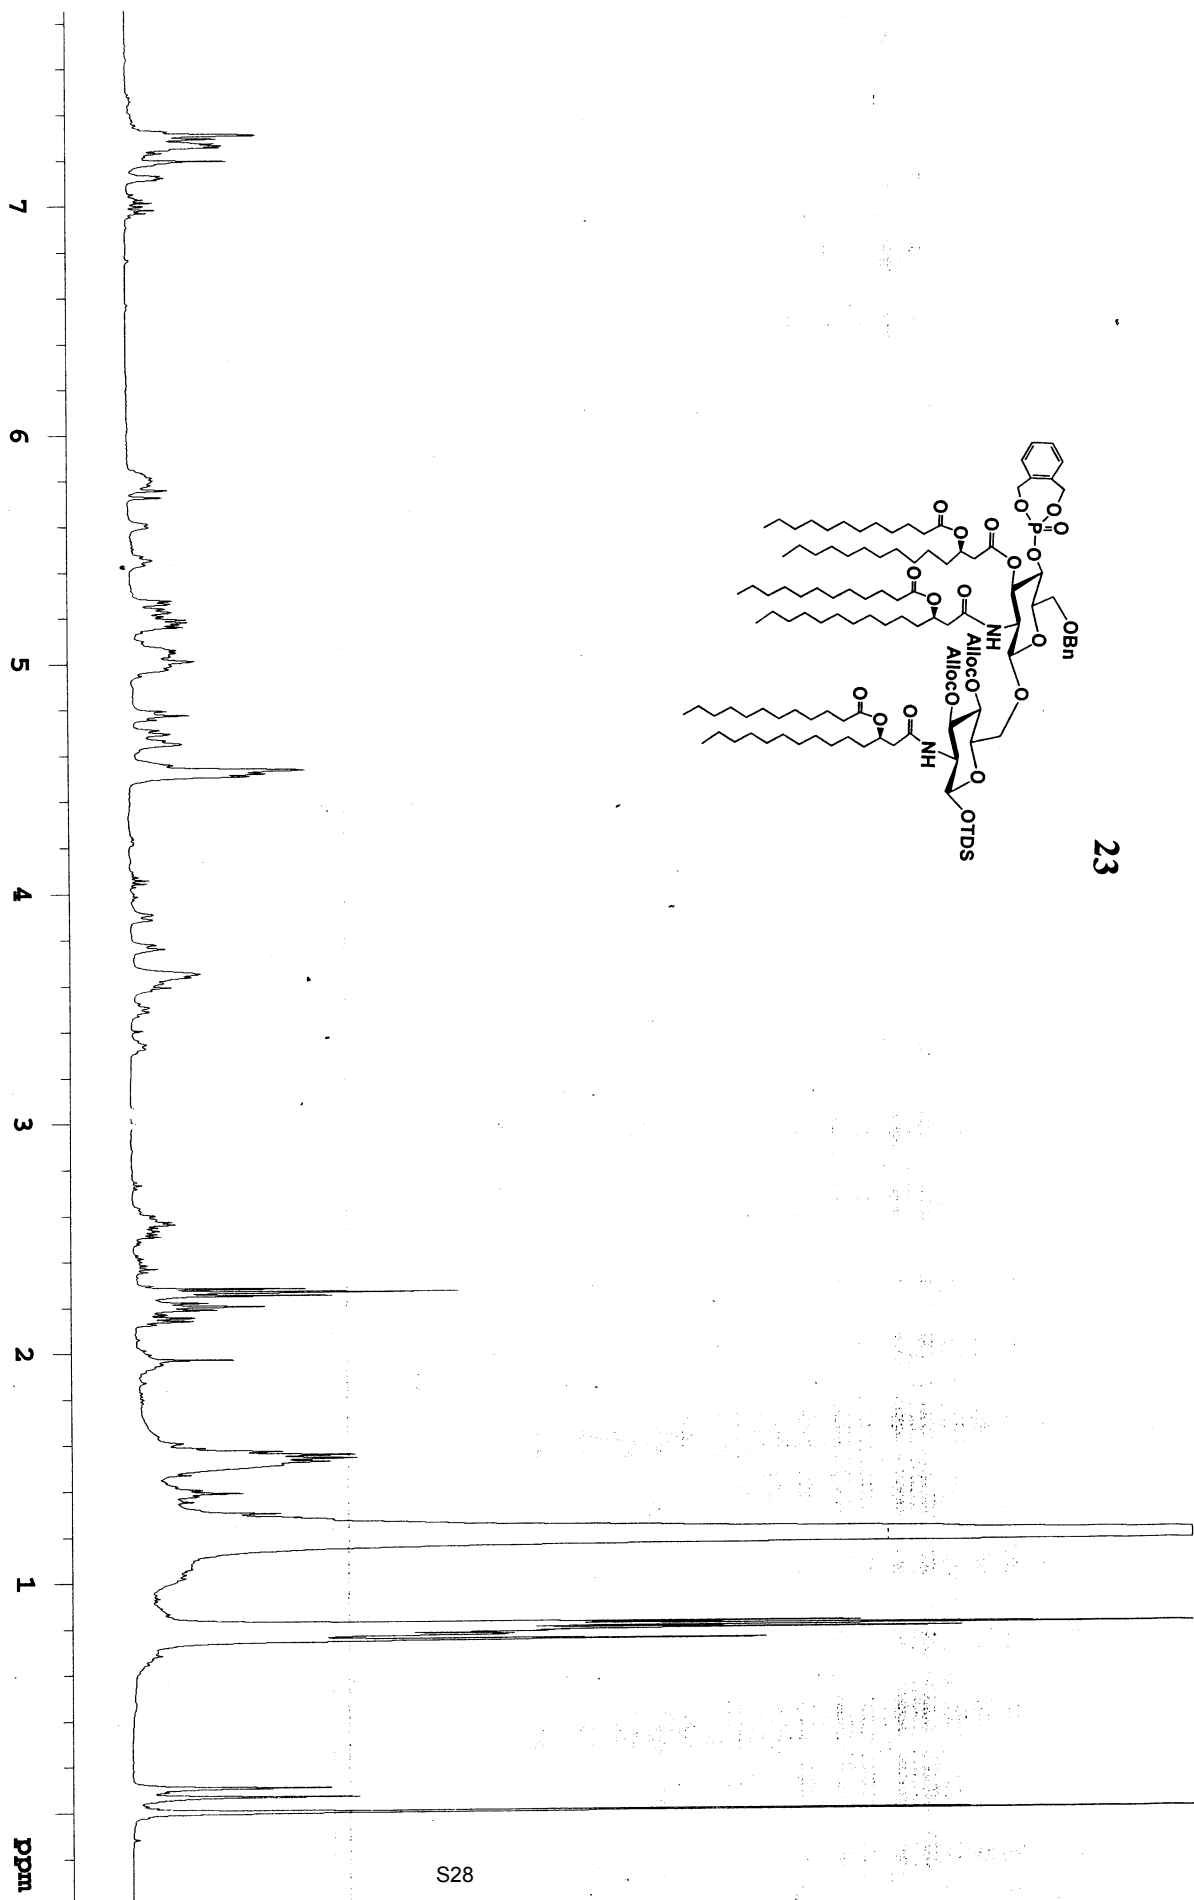



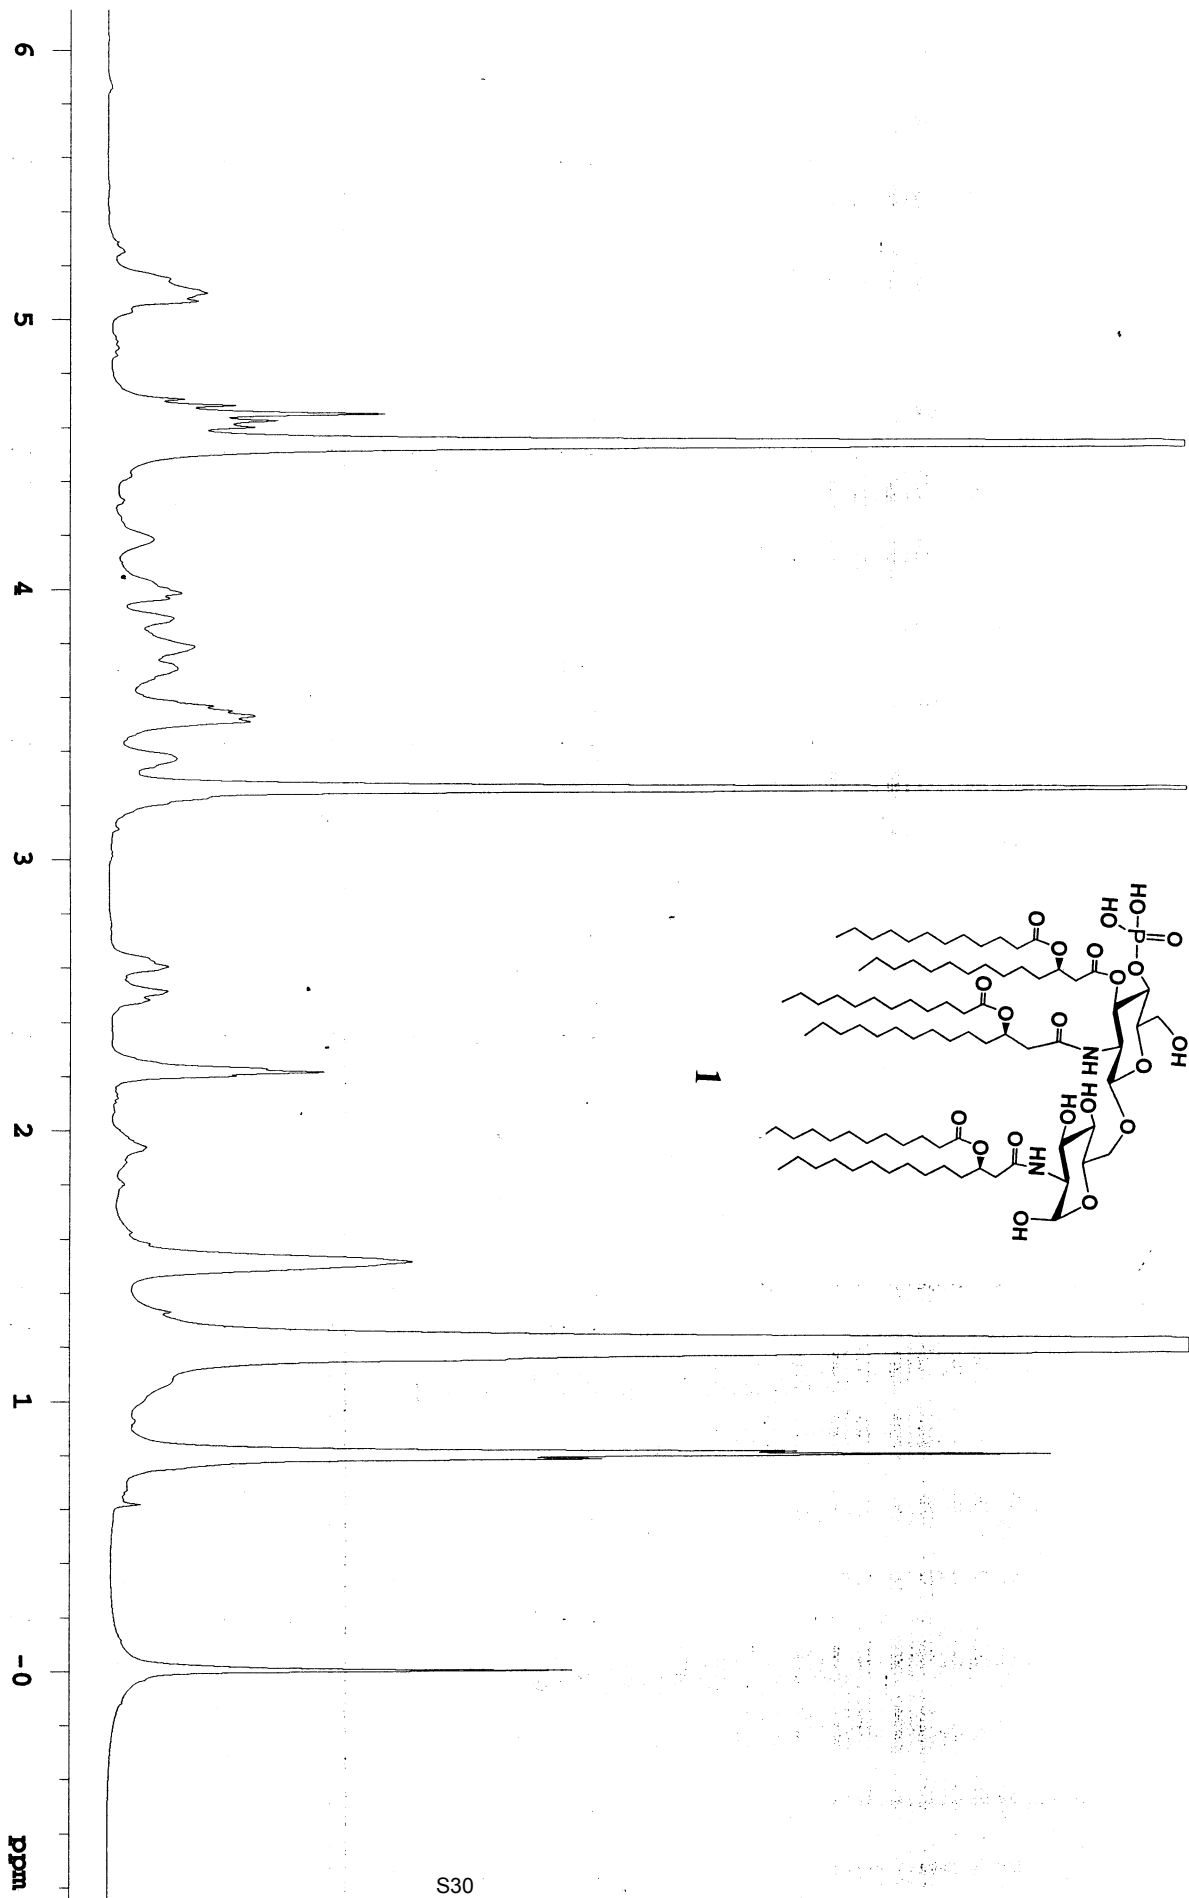

Supplement: NIHMS160475-supplement-Supp_Info.pdf [file NIHMS160475-supplement-Supp_Info.pdf]
